# Supplementary material
Source: HighWire-hosted journal article supplement (https://erj.ersjournals.com/content/59/4/2101612)

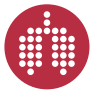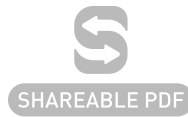

# A systematic review of blood biomarkers with individual participant data meta-analysis of matrix metalloproteinase-7 in idiopathic pulmonary fibrosis

Fasihul A. Khan<sup>1,2</sup>, Iain Stewart<sup>1,2,3</sup>, Gauri Saini<sup>1</sup>, Karen A. Robinson<sup>4</sup> and R. Gisli Jenkins<sup>1,2,3</sup>

<sup>1</sup>Division of Respiratory Medicine, School of Medicine, University of Nottingham, Nottingham, UK. <sup>2</sup>Nottingham Biomedical Research Centre, National Institute for Health Research, Nottingham, UK. <sup>3</sup>Margaret Turner Warwick Centre for Fibrosing Lung Disease, National Health and Lung Institute, Imperial College London, London, UK. <sup>4</sup>Epidemiology and Health Policy and Management, Johns Hopkins University, Baltimore, MD, USA.

Corresponding author: Fasihul A. Khan (fasihul.khan@nottingham.ac.uk)

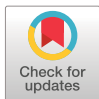

Shareable abstract (@ERSpublications)

**Robust methodology using individual participant data meta-analysis demonstrates that baseline MMP-7 levels predict overall mortality and disease progression in patients with untreated IPF independent of age, gender, smoking status and lung function** <https://bit.ly/2WIPudQ>

**Cite this article as:** Khan FA, Stewart I, Saini G, *et al.* A systematic review of blood biomarkers with individual participant data meta-analysis of matrix metalloproteinase-7 in idiopathic pulmonary fibrosis. *Eur Respir J* 2022; 59: 2101612 [DOI: 10.1183/13993003.01612-2021].

This single-page version can be shared freely online.

Copyright ©The authors 2022.

This version is distributed under the terms of the Creative Commons Attribution Licence 4.0.

Received: 7 June 2021  
Accepted: 21 Aug 2021

## Abstract

**Background** Blood-derived biomarkers have been described extensively as potential prognostic markers in idiopathic pulmonary fibrosis (IPF), but studies have been limited by analyses using data-dependent thresholds, inconsistent adjustment for confounders and an array of end-points, thus often yielding ungeneralisable results. Meta-analysis of individual participant data (IPD) is a powerful tool to overcome these limitations. Through systematic review of blood-derived biomarkers, sufficient studies with measurements of matrix metalloproteinase (MMP)-7 were identified to facilitate standardised analyses of the prognostic potential of this biomarker in IPF.

**Methods** Electronic databases were searched on 12 November 2020 to identify prospective studies reporting outcomes in patients with untreated IPF, stratified according to at least one pre-specified biomarker, measured at either baseline, or change over 3 months. IPD were sought for studies investigating MMP-7 as a prognostic factor. The primary outcome was overall mortality according to standardised MMP-7 z-scores, with a secondary outcome of disease progression in 12 months, all adjusted for age, gender, smoking and baseline forced vital capacity.

**Results** IPD was available for nine studies out of 12 identified, reporting outcomes from 1664 participants. Baseline MMP-7 levels were associated with increased mortality risk (adjusted hazard ratio 1.23, 95% CI 1.03–1.48;  $I^2=64.3\%$ ) and disease progression (adjusted OR 1.27, 95% CI 1.11–1.46;  $I^2=5.9\%$ ). In limited studies, 3-month change in MMP-7 was not associated with outcomes.

**Conclusion** IPD meta-analysis demonstrated that greater baseline MMP-7 levels were independently associated with an increased risk of poor outcomes in patients with untreated IPF, while short-term changes did not reflect disease progression.

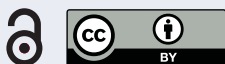

Supplement: inline-supplementary-material-2 [file inline-supplementary-material-2.pdf]
