# Supplementary material
Source: HighWire-hosted journal article supplement (https://erj.ersjournals.com/content/59/4/2101612)
Supplement: inline-supplementary-material-1 [file inline-supplementary-material-1.pdf]

## Supplementary Material

Figure S1 - MEDLINE search strategy

Figure S2 – Letter to authors for individual participant data

Figure S3 – Funnel plots for baseline MMP-7

Figure S4 – Funnel plots for change in MMP-7 over 3 months

Figure S5 – Forest plot for change in MMP-7 over 3 months and overall mortality

Figure S6 – Forest plot for change in MMP-7 over 3 months and 12 months mortality

Figure S7 – Forest plot for baseline MMP-7 and disease progression separated by ELISA and non-ELISA

Figure S8 – Forest plot for change in MMP-7 over 3 months and disease progression

Figure S9 – Forest plot for change in MMP-7 over 3 months and relative change in FVC at 12 months

Figure S10 – Forest plot for baseline MMP-7 and mortality and disease progression in unadjusted analyses

Table S1 – Methodological characteristics of non-MMP7 studies

Table S2 – Risk of bias for included studies per individual study

Table S3 – Meta-regression for variables assessed

Table S4 – GRADE rating

Table S5 – Table of mortality outcomes for baseline biomarkers

Table S6 – Table of mortality outcomes for short term change in biomarkers

Table S7 – Table of disease progression definition and outcomes for baseline biomarkers

Table S8 – Table of FVC change definitions and outcomes for baseline biomarkers

Table S9 – Table of disease progression definitions and outcomes for short term change in biomarkers

| Participants                                             | Intervention                                                   | Intervention                                                                                          | Outcomes                     |
|----------------------------------------------------------|----------------------------------------------------------------|-------------------------------------------------------------------------------------------------------|------------------------------|
| 1. idiopathic pulmonary fibros*.mp.                      | 12. Mucin-1/                                                   | 45. Chitinase-3-Like Protein 1/ or Chitinase-3-like protein 1.mp.                                     | 78. prognosis.sh.            |
| 2. pulmonary fibros*.mp.                                 | 13. KL-6.mp.                                                   | 46. IGFBP-2.mp. or Insulin-Like Growth Factor Binding Protein 2/                                      | 79. diagnosed.tw.            |
| 3. Pulmonary Fibrosis/ or Idiopathic Pulmonary Fibrosis/ | 14. krebs von den lungen-6.mp.                                 | 47. Insulin like growth factor binding protein 2.mp.                                                  | 80. cohort:.mp.              |
| 4. cryptogenic fibrosing alveolitis.mp.                  | 15. SP-A.mp.                                                   | 48. ICAM-1.mp. or Intercellular Adhesion Molecule-1/                                                  | 81. predictor:.tw.           |
| 5. usual interstitial pneumonia*.mp.                     | 16. Pulmonary Surfactant-Associated Protein A/                 | 49. VEGF.mp. or Vascular Endothelial Growth Factor A/                                                 | 82. death.tw.                |
| 6. Fibrosing alveolitis.mp.                              | 17. Pulmonary Surfactant-Associated Protein D/                 | 50. HSP70 HEAT-SHOCK PROTEINS/ or HSP70.mp.                                                           | 83. exp models, statistical/ |
| 7. Idiopathic Interstitial Pneumonia*.mp.                | 18. Pulmonary Surfactants/                                     | 51. LEPTIN/ or Leptin.mp.                                                                             | 84. disease progression.sh.  |
| 8. Interstitial pneumonia*.mp.                           | 19. SP-D.mp.                                                   | 52. CXCL13.mp. [mp=title, abstract, original title, name of substance                                 | 85. disease progression.mp.  |
| 9. Idiopathic interstitial lung disease.mp.              | 20. surfactant protein*.mp.                                    | 53. Chemokine CXCL13/ or C-X-C motif chemokine 13.mp.                                                 |                              |
| 10. Chronic interstitial pneumonia*.mp.                  | 21. CA-125 Antigen/ or CA125.mp.                               | 54. Forced Vital Capacity.mp. or Vital Capacity/                                                      |                              |
|                                                          | 22. cancer antigen 125.mp.                                     | 55. FVC.mp.                                                                                           |                              |
|                                                          | 23. mucin 16.mp.                                               | 56. Forced Expiratory Volume/ or FEV1.mp.                                                             |                              |
|                                                          | 24. CA-19-9 Antigen/ or CA19-9.mp.                             | 57. forced expiratory volume.mp.                                                                      |                              |
|                                                          | 25. cancer antigen 19-9.mp.                                    | 58. 6-minute walk.mp.                                                                                 |                              |
|                                                          | 26. carbohydrate antigen 19-9.mp.                              | 59. Six-minute walk.mp.                                                                               |                              |
|                                                          | 27. Matrix Metalloproteinase 1/ or MMP-1.mp.                   | 60. Walk Test/                                                                                        |                              |
|                                                          | 28. Matrix Metalloproteinase 7/ or MMP-7.mp.                   | 61. walk test.mp.                                                                                     |                              |
|                                                          | 29. matrix metalloproteinase.mp. or Matrix Metalloproteinases/ | 62. 6MWT.mp.                                                                                          |                              |
|                                                          | 30. LOXL2.mp.                                                  | 63. 6MWD.mp.                                                                                          |                              |
|                                                          | 31. Protein-Lysine 6-Oxidase/                                  | 64. Pulmonary diffusing capacity.mp. or Pulmonary Diffusing Capacity/                                 |                              |
|                                                          | 32. protein-lysine 6-oxidase.mp.                               | 65. Diffusion capacity for carbon monoxide.mp.                                                        |                              |
|                                                          | 33. periostin.mp.                                              | 66. DLCO.mp.                                                                                          |                              |
|                                                          | 34. Osteoblast-specific factor 2.mp.                           | 67. Transfer factor.mp. or Transfer Factor/                                                           |                              |
|                                                          | 35. Epitopes/ or Neoepitope*.mp.                               | 68. Gas transfer.mp.                                                                                  |                              |
|                                                          | 36. Chemokines, CC/ or CCL18.mp.                               | 69. TLCO.mp.                                                                                          |                              |
|                                                          | 37. Chemokine CCL18.mp.                                        | 70. KCO.mp.                                                                                           |                              |
|                                                          | 38. Chemokines, CC/ or CC-chemokine ligand 18.mp.              | 71. PHYSIOLOGY/                                                                                       |                              |
|                                                          | 39. IL-8.mp. or Interleukin-8/                                 | 72. Physiolog*.mp.                                                                                    |                              |
|                                                          | 40. Interleukin-8.mp.                                          | 73. SPIROMETRY/                                                                                       |                              |
|                                                          | 41. CXCL8.mp.                                                  | 74. spiromet*.mp.                                                                                     |                              |
|                                                          | 42. Chemokine ligand 8.mp.                                     | 75. biomarkers.mp. or BIOMARKERS/                                                                     |                              |
|                                                          | 43. Chitinase-3-Like Protein 1/ or YKL-40.mp.                  | 76. ((Serum or clinical or immun* or lab or laboratory or biochemical or biological) and marker*).mp. |                              |
|                                                          | 44. CHI3L1.mp.                                                 |                                                                                                       |                              |

**Supplementary Figure S1** – MEDLINE search strategy (last search carried out on 12<sup>th</sup> November 2020). “OR” was used to combine search terms within each PICOS category, with “AND” used to combine search terms across PICOS categories.

Copy of email sent to authors

We would be very grateful for your assistance in undertaking a robust meta-analysis. The team at University of Nottingham (UK), led by Prof Gisli Jenkins, are conducting a systematic review and meta-analysis of blood biomarkers in IPF. The protocol for the study can be found on PROSPERO: [https://www.crd.york.ac.uk/prospero/display\\_record.php?RecordID=120402](https://www.crd.york.ac.uk/prospero/display_record.php?RecordID=120402)

As part of the review, we will conduct a meta-analysis of the association of MMP-7 levels with mortality in IPF. We have chosen this biomarker because there is sufficient published data to make it feasible and useful.

To assist with this, we would be extremely grateful if you could kindly provide us with individual patient data from your highly relevant study entitled “...” published in ...

We also note significant heterogeneity in disease progression definitions across individual studies, and therefore hope to meta-analyse MMP-7 level associations with a shared definition based on FVC and mortality and would also appreciate data to assist with this. We appreciate the inconvenience such requests entail, and we would like to make the process as smooth as possible, we will of course acknowledge all support.

The attached excel spreadsheet highlights the anonymised data we are seeking for each patient, where available:

- MMP-7 level (baseline and 3-months)
- Assay method (type of assay used)
- Sample type (serum or plasma)
- Age
- Gender (M or F)
- Follow up time (days)
- Dead or alive at end
- Time to death (days)
- Baseline FVC (% predicted)
- 3-month FVC (% predicted)
- 12-month FVC (% predicted)
- Smoking (ever or never)

Thank you for your help, we look forward to communicating with you further.

**Supplementary Figure S2** – copy of message sent to authors for individual participant data. A minimum of three reminders, 4 weeks apart were sent.

A: Mortality.

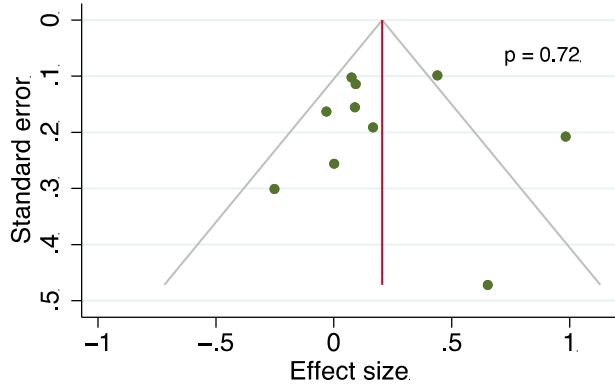

B: 12 month mortality

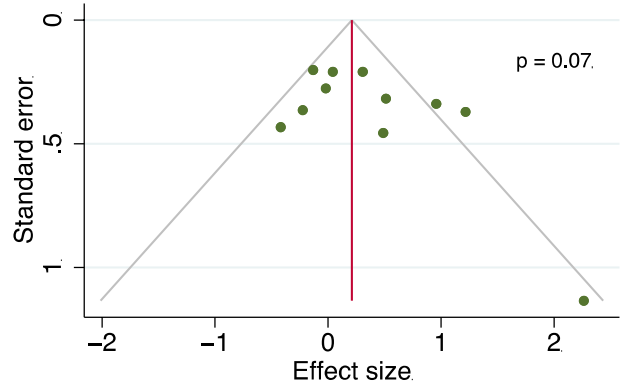

C: Disease progression

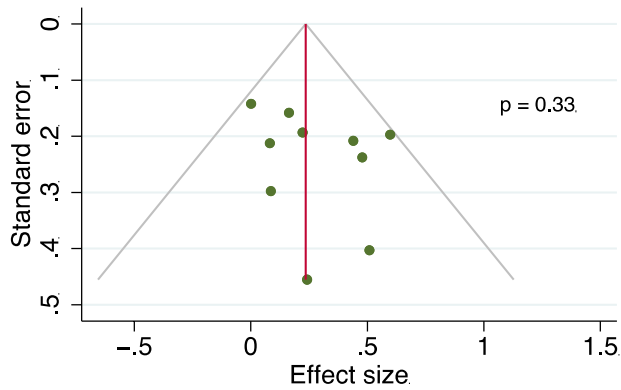

D: Change in FVC %predicted at 12 months

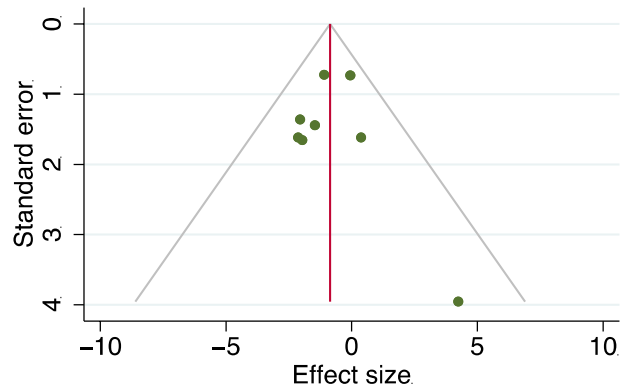

**Supplementary Figure S3** – Funnel plots for outcomes evaluated in baseline MMP-7 IPD meta-analysis. A: overall mortality, B: 12-month mortality, C: Disease progression, D: Change in percent predicted FVC at 12 months. Publication bias assessed using Egger’s test for outcomes with at least ten studies, and p values presented next to funnel plot.

A: Mortality.

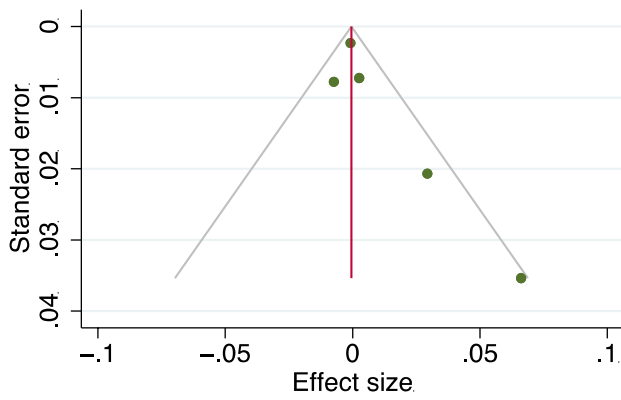

B: 12 month mortality

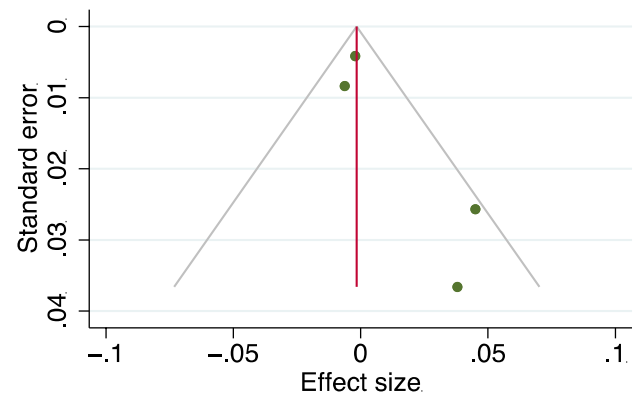

C: Disease progression

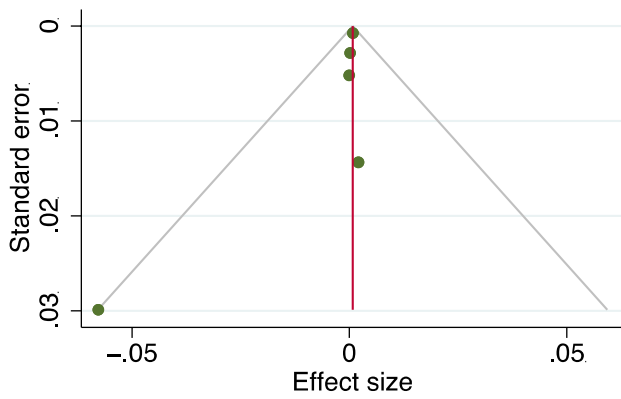

D: Change in FVC %predicted at 12 months

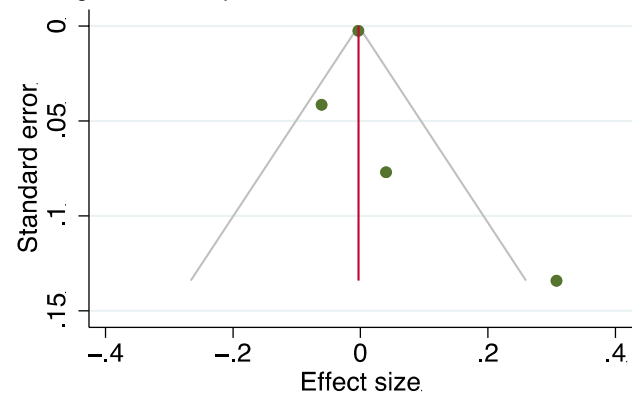

**Supplementary Figure S4** – Funnel plots for outcomes evaluated for three-month change in MMP-7 IPD meta-analysis. A: overall mortality, B: 12-month mortality, C: Disease progression, D: Change in percent predicted FVC at 12 months.

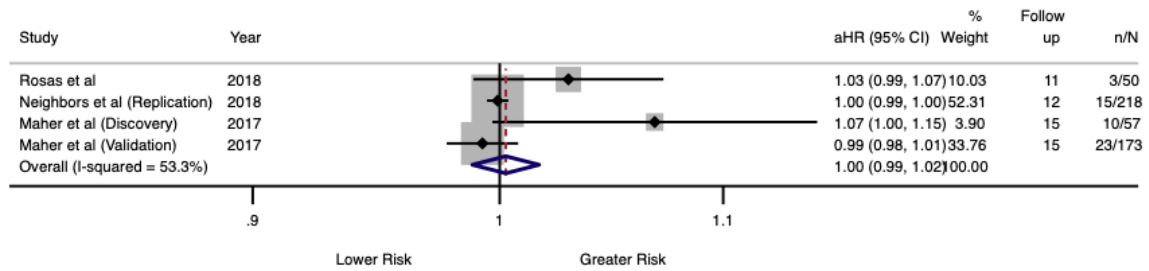

**Supplementary Figure S5** - Pooled hazard ratios with 95% confidence intervals for risk of overall mortality, per percent relative increase in MMP-7 from baseline to three months. Study follow up time shown in months. n denotes the number of deaths, and N represents the total number of participants included per study.

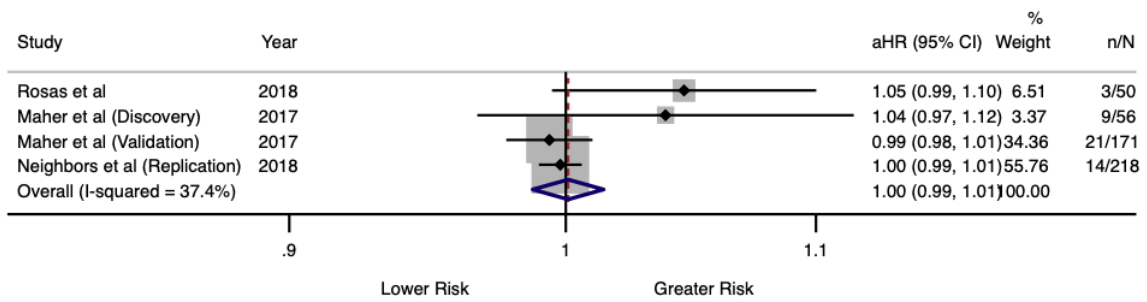

**Supplementary Figure S6** - Pooled hazard ratios with 95% confidence intervals for risk of mortality at 12 months, per percent relative increase in MMP-7 from baseline to three months. n denotes the number of deaths, and N represents the total number of participants included per study.

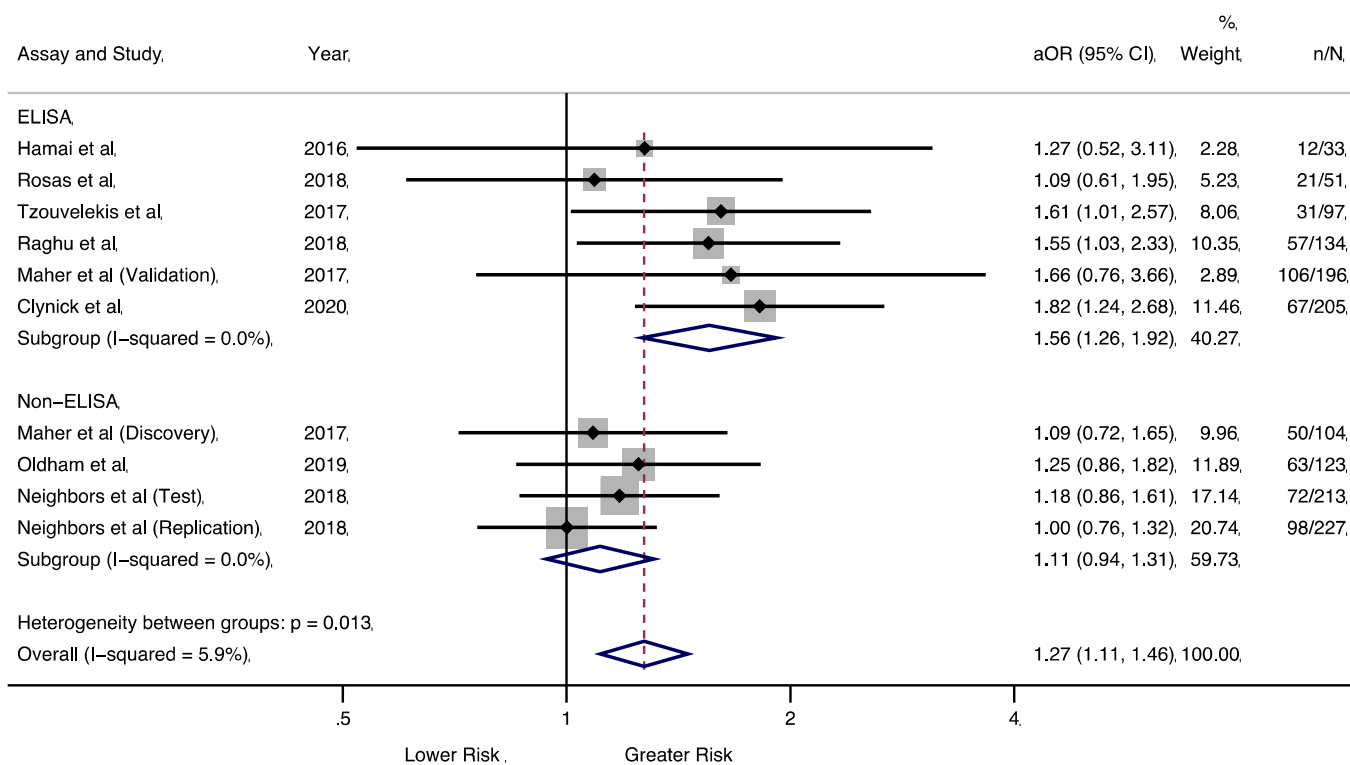

NOTE: Weights are from random-effects model.

**Supplementary Figure S7** – Pooled odds ratios with 95% confidence intervals for risk of disease progression, per standard deviation increase in baseline MMP-7. Separated by ELISA and non-ELISA measurements. n denotes the number of progressors, and N represents the total number of participants included in the analysis per study.





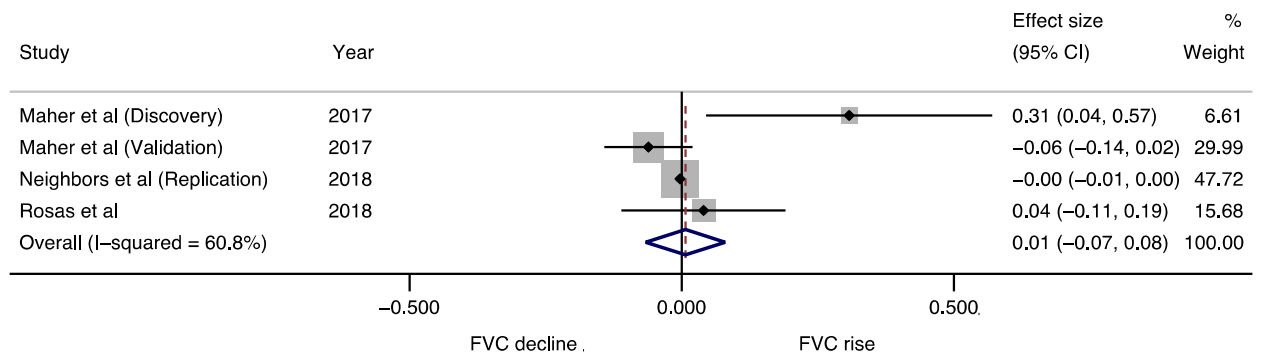

NOTE: Weights are from random-effects model

**Supplementary Figure S9** – Pooled effect size with 95% confidence intervals for relative change in FVC at 12 months, per percent relative increase in baseline MMP-7 to three months.

A.

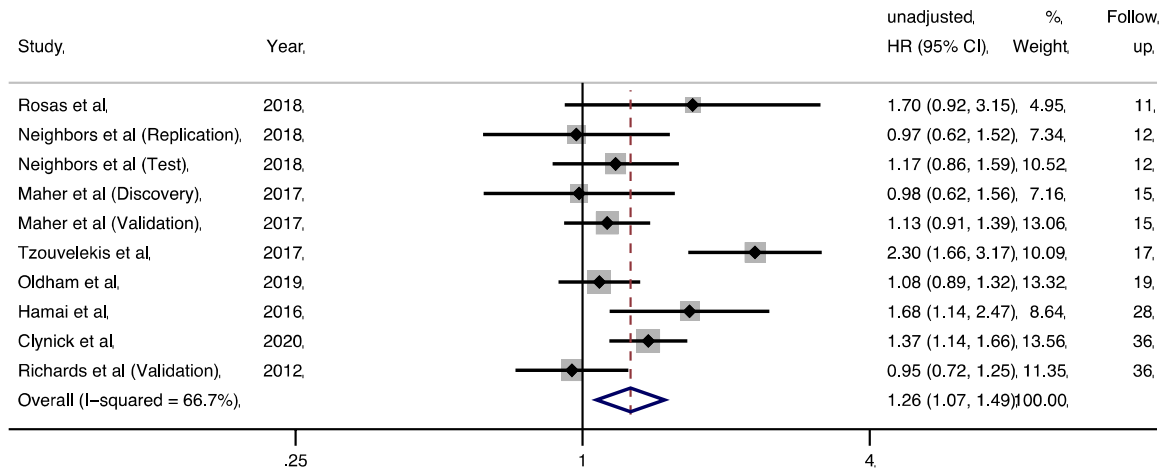

B.

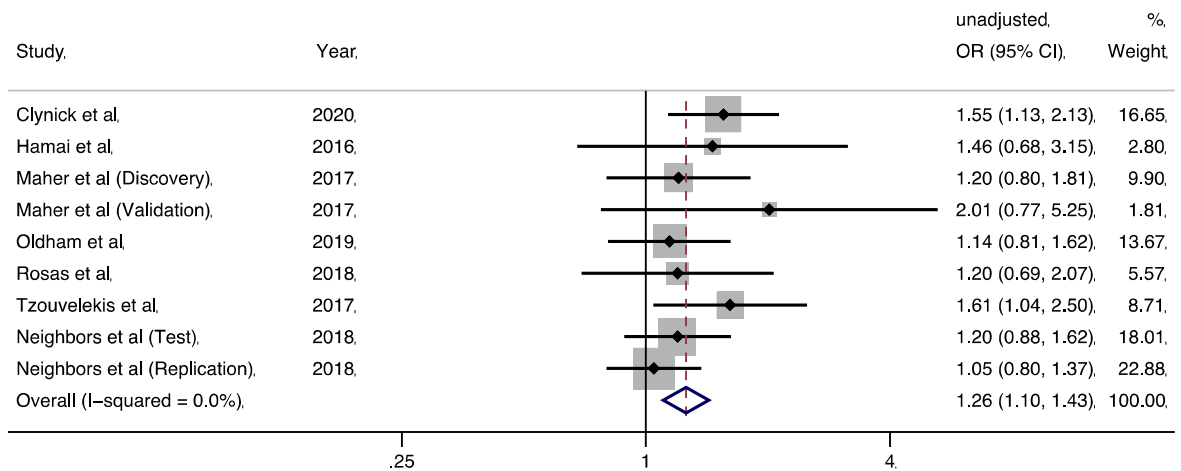

**Supplementary Figure S10** – Unadjusted analyses including pooled estimates with 95% confidence intervals for association of baseline MMP-7 per standard deviation increase and A. Mortality, B. Disease progression.

| Author and year of publication | Country of study             | IPF Sample size             | Study follow up, months      | Age (years)               | Sex – male (%) | Baseline FVC % predicted | Baseline DL <sub>CO</sub> % predicted | Relevant Biomarkers evaluated              | Relevant outcomes reported                                                                                                                                                                                     |
|--------------------------------|------------------------------|-----------------------------|------------------------------|---------------------------|----------------|--------------------------|---------------------------------------|--------------------------------------------|----------------------------------------------------------------------------------------------------------------------------------------------------------------------------------------------------------------|
| Bauer, 2017 <sup>1</sup>       | multi-national               | 211 (BUILD-3 <sup>2</sup> ) | NR                           | 63.1 (8.9)                | 64             | 75.7 (10.7)              | 47.7 (10.7)                           | collagen synthesis peptides                | Disease progression (FVC≥10% decline, DL <sub>CO</sub> ≥ 15%, acute exacerbation or death) up to end of study, change in FVC at 4 months                                                                       |
| Chien, 2014 <sup>3</sup>       | USA multi-national           | 69 (ARTEMIS <sup>4</sup> )  | 24                           | 66.2 (7)                  | 75             | 69.8 (12.1)              | 42.1 (11.1)                           | LOXL2                                      | Overall mortality, lung function decline at 24 months (FVC≥10% with DL <sub>CO</sub> ≥ 5%, or DL <sub>CO</sub> ≥ 15% with FVC ≥ 5%), disease progression (mortality, hospitalisation or lung function decline) |
|                                | USA multi-national           | 104 (GAP <sup>5</sup> )     |                              | 66.7 (8.9)                | 70             | 66.1 (17.7)              | 47.8 (18)                             |                                            |                                                                                                                                                                                                                |
| Collard, 2010 <sup>6</sup>     | South Korea single centre    | 47 (AE-IPF)                 | NR                           | 66 (8)                    | 77             | 75 (18)                  | 64 (20)                               | KL-6, SP-D                                 | Overall mortality, acute exacerbation                                                                                                                                                                          |
|                                |                              | 20 (without AE-IPF)         |                              | 63 (7)                    | 80             | 84 (19)                  | 74 (22)                               |                                            |                                                                                                                                                                                                                |
| Doubkova, 2016 <sup>7</sup>    | Czech Republic single centre | 18                          | NR                           | 68.5 (49-79) <sup>a</sup> | 56             | 68 (median)              | 52 (median)                           | SP-A, SP-D                                 | Overall mortality, change in FVC                                                                                                                                                                               |
| Gui, 2020 <sup>8</sup>         | China single centre          | 126                         | 60                           | NR                        | 75.4           | 70.1 (17)                | 50.5 (12.6)                           | KL-6, CXCL13                               | Overall mortality, change in FVC over 12 months                                                                                                                                                                |
| Hamai, 2016 <sup>9</sup>       | Japan single centre          | 65                          | 31 (26.6-35.4) <sup>b</sup>  | 69.3 (8.6)                | 77             | 75.6 (21.9)              | 47.1 (15.8)                           | SP-A, SP-D, CCL-18, KL-6                   | 5-year mortality                                                                                                                                                                                               |
| Hoyer, 2020 <sup>10</sup>      | Denmark multi-centre         | 184                         | 36                           | NR                        | NR             | NR                       | NR                                    | PRO-C3, PRO-C6                             | Overall mortality, disease progression (FVC decline >10% and/or DL <sub>CO</sub> decline >15% at any time)                                                                                                     |
| Jiang, 2018 <sup>11</sup>      | China single centre          | 20 (85 ILD)                 | 12                           | 53.5 (10.5)               | 59 *           | 71.1 (17.7) *            | 49.4 (24.3) *                         | KL-6                                       | Disease progression (FVC decline ≥ 10% or DL <sub>CO</sub> decline ≥ 15%, or death) at 12 months                                                                                                               |
| Jenkins, 2015 <sup>12</sup>    | UK multi-centre              | 55 (Discovery)              | 26 (1.6-35.2) <sup>a</sup>   | 68.5 (9.5)                | 78             | 75.9 (23.5)              | 44.4 (18.3)                           | ECM-neoepitopes                            | Overall mortality, disease progression at 12 months (all-cause mortality or >10% FVC decline)                                                                                                                  |
|                                |                              | 134 (Validation)            | 21.2 (0.8-36.2) <sup>a</sup> | 70.7 (7.7)                | 79             | 78.1 (17.2)              | 42.1 (13.5)                           |                                            |                                                                                                                                                                                                                |
| Kennedy, 2015 <sup>13</sup>    | Ireland single centre        | 13                          | 6                            | 72.6 (10.7)               | 77             | 83.3 (26.9)              | 39.1 (16.1)                           | SP-D                                       | Change in FVC at 6 months                                                                                                                                                                                      |
| Kinder, 2009 <sup>14</sup>     | USA single centre            | 82                          | 36 (16-72) <sup>b</sup>      | 62 (10)                   | 62             | 64 (18)                  | 54 (16)                               | SP-A, SP-D                                 | Death or transplantation at 1 year                                                                                                                                                                             |
| Maher, 2017 <sup>15</sup>      | UK multi-centre              | 106 (Discovery)             | 36                           | 70.8 (8.3)                | 78             | 79 (18.9)                | 43.3 (14.8)                           | SP-D, CA125, CA19-9, IGFBP-2, IL-8, ICAM-1 | Overall mortality, disease progression at 12 months (all-cause mortality or FVC decline ≥ 10%)                                                                                                                 |
|                                |                              | 206 (Validation)            |                              | 72.5 (7.7)                | 76             | 81.4 (19.2)              | 49 (16.9)                             | SP-D, CA125, CA19-9                        |                                                                                                                                                                                                                |
| Naik, 2012 <sup>16</sup>       | USA multi-centre             | 54 (COMET <sup>17</sup> )   | 18.5                         | 64.3 (8.2)                | 72             | 68.5 (15.8)              | 40.8 (14.3)                           | Periostin                                  | Disease progression at 48 weeks (death, acute exacerbation, transplantation, relative FVC decline ≥ 10% or DL <sub>CO</sub> > 15%)                                                                             |

|                               |                          |                               |                            |                           |    |                         |                         |                                                        |                                                                                                                                         |
|-------------------------------|--------------------------|-------------------------------|----------------------------|---------------------------|----|-------------------------|-------------------------|--------------------------------------------------------|-----------------------------------------------------------------------------------------------------------------------------------------|
| Neighbors, 2018 <sup>18</sup> | multi-national           | 221<br>CAPACITY <sup>19</sup> | 12                         | 66.9 (7.4)                | 72 | 73.4 (13.4)             | 46.5 (9.4)              | CCL-18, CXCL13,<br>YKL-40, Periostin                   | At 12 months: Disease progression (FVC $\geq$ 10% absolute decline or death), change in FVC, death                                      |
|                               |                          | 244<br>ASCEND <sup>20</sup>   |                            | 67.7 (7.2)                | 77 | 68.3 (10.9)             | 43.9 (11.9)             |                                                        |                                                                                                                                         |
| Ohshimo, 2014 <sup>21</sup>   | Germany<br>single centre | 64 (without AE-<br>IPF)       | 36 (25.2)                  | 70 (8)                    | 73 | 68 (15)                 | 44 (14)                 | KL-6, CCL-18                                           | Acute exacerbation                                                                                                                      |
|                               |                          | 13 (with AE-IPF)              |                            | 67 (5)                    | 85 | 54 (17)                 | 43 (10)                 |                                                        |                                                                                                                                         |
| Ohta, 2017 <sup>22</sup>      | Japan<br>multi-centre    | 60                            | 6.2 (5.8-8.5) <sup>a</sup> | 69.2 (8.1)                | 92 | 85.8 (20.1)             | 59.7 (21.8)             | Monomeric Periostin, Periostin,<br>KL-6, SP-D          | Change in FVC at 6-12 months                                                                                                            |
| Okamoto, 2011 <sup>23</sup>   | Japan<br>multi-centre    | 37                            | NR                         | 66.3 (8.6)                | 84 | 80.2 (20)               | NR                      | Periostin                                              | Overall months                                                                                                                          |
| Organ, 2019 <sup>24</sup>     | UK<br>multi-centre       | 145                           | 34.5 (median)              | 71.7 (7.7)                | 81 | 79.8 (20.4)             | 48.2 (17.9)             | ECM-neoepitopes, collagen<br>synthesis peptides        | Overall mortality, disease progression at 12 months (all-cause mortality or >10% FVC decline)                                           |
| Papis, 2018 <sup>25</sup>     | Greece<br>single centre  | 23<br>(stable)                | 12                         | 71 (69-74) <sup>b</sup>   | 82 | 72 (60-93) <sup>b</sup> | 56 (38-65) <sup>b</sup> | IL-8                                                   | Overall mortality at 12 months                                                                                                          |
|                               |                          | 18<br>(exacerbated)           |                            | 68.5 (67-78) <sup>b</sup> | 61 | 60 (44-64) <sup>b</sup> | 35 (30-36) <sup>b</sup> |                                                        |                                                                                                                                         |
| Prasse, 2009 <sup>26</sup>    | Germany and<br>Italy     | 72                            | 24                         | 67.2 (8.6)                | NR | NR                      | NR                      | CCL-18                                                 | Overall mortality, change in FVC at 6 months, disease progression at 24 months (>10% FVC decline or death)                              |
| Raghu, 2018 <sup>27</sup>     | multi-national           | 154                           | 12                         | 67.9 (8.4)                | 64 | 71.5 (19.6)             | 40.9 (15.9)             | SP-A, SP-D, CCL-18, KL-6, ICAM-1,<br>Periostin, YKL-40 | Disease progression at 52 weeks (FVC decrease $\geq$ 10% predicted or DL <sub>CO</sub> decrease > 15% or lung transplantation or death) |
| Richards, 2012 <sup>28</sup>  | USA<br>single centre     | 140<br>(Derivation)           | 22 (19)                    | 67.2 (8.3)                | 72 | 62 (19.6)               | 44.8 (17.1)             | IL-8, ICAM-1                                           | Overall mortality, disease progression (FVC relative decline $\geq$ 10% within any 1 year of follow up)                                 |
|                               |                          | 101<br>(Validation)           | 17 (16)                    | 68 (8.7)                  | 66 | 60.8 (17)               | 45.4 (19)               |                                                        |                                                                                                                                         |
| Vuga, 2014 <sup>29</sup>      | USA<br>single centre     | 95                            | > 24                       | 69 (9.7)                  | 74 | 66 (19.5)               | 50 (19.5)               | CXCL13                                                 | Overall mortality                                                                                                                       |

**Supplementary Table S1** – Methodological characteristics of all included non-MMP7 studies with baseline participant characteristics and outcome data. Age, baseline FVC and baseline DL<sub>CO</sub> reported as mean (standard deviation) unless otherwise stated.

DL<sub>CO</sub>, gas transfer for carbon monoxide; FVC, forced vital capacity; <sup>a</sup> = median and range; <sup>b</sup> = median and IQR

\* = reported for all ILD

| Study                          | Study participation | Study attrition | Prognostic factor | Outcome  | Confounding | Statistical analysis and reporting |
|--------------------------------|---------------------|-----------------|-------------------|----------|-------------|------------------------------------|
| <b>IPD studies</b>             |                     |                 |                   |          |             |                                    |
| Hamai, 2016                    | Moderate            | Moderate        | Low               | Low      | Low         | Low                                |
| Maher, 2017                    | Low                 | Moderate        | Low               | Low      | Low         | Low                                |
| Navaratnam, 2014/Clynick, 2020 | Low                 | Moderate        | Low               | Low      | Low         | Low                                |
| Neighbors, 2018                | Low                 | Low             | Low               | Low      | Low         | Low                                |
| Oldham, 2019                   | Low                 | High            | High              | Low      | High        | Moderate                           |
| Raghu, 2018                    | Low                 | Low             | Low               | Low      | Moderate    | Low                                |
| Richards, 2012                 | Low                 | Low             | Low               | Low      | Moderate    | Low                                |
| Rosas, 2018                    | Low                 | Low             | Low               | Low      | High        | Moderate                           |
| Tzouvelekis, 2017              | Low                 | Low             | Low               | Low      | Low         | Low                                |
| <b>Non-IPD studies</b>         |                     |                 |                   |          |             |                                    |
| Bauer, 2017                    | Low                 | Low             | Moderate          | Low      | High        | Low                                |
| Chien, 2014                    | Low                 | Low             | Low               | Low      | Moderate    | Low                                |
| Collard, 2010                  | Low                 | Low             | Low               | Low      | High        | Low                                |
| Doubkova, 2016                 | Moderate            | High            | High              | High     | High        | High                               |
| Gui, 2020                      | Low                 | Low             | Low               | Moderate | High        | Low                                |
| Hoyer, 2020                    | High                | High            | High              | Low      | High        | High                               |
| Jiang, 2018                    | Low                 | Low             | Low               | Low      | High        | Low                                |
| Jenkins, 2015                  | Low                 | Moderate        | Low               | Low      | Low         | Low                                |
| Kennedy, 2015                  | Moderate            | Low             | Low               | Low      | High        | Moderate                           |
| Kinder, 2009                   | Low                 | Low             | Low               | Low      | Low         | Low                                |
| Naik, 2012                     | Low                 | Low             | Low               | Low      | Low         | Low                                |
| Ohshimo, 2014                  | Low                 | Low             | Low               | Low      | Low         | Low                                |
| Ohta, 2017                     | Low                 | High            | Low               | Low      | High        | Low                                |
| Okamoto, 2011                  | Low                 | High            | Low               | Low      | Low         | Moderate                           |
| Organ, 2019                    | Low                 | Moderate        | Low               | Low      | Low         | Low                                |
| Papiris, 2018                  | Low                 | Low             | Low               | Low      | High        | Moderate                           |
| Peljto, 2013                   | Low                 | Low             | Moderate          | Low      | Low         | Low                                |
| Prasse, 2009                   | Moderate            | Low             | Low               | Low      | Low         | Low                                |
| Sokai, 2015                    | Low                 | Low             | Low               | Low      | High        | Low                                |
| Vuga, 2014                     | Moderate            | High            | Low               | High     | Low         | Low                                |

**Supplementary Table S2** – Risk of bias assessment for included studies. The risk of bias across studies was rated as low, moderate or high risk in six categories using the QUIPs tool.

| Baseline MMP-7                   |                            |         |                              |         |                               |         |                                                         |         |
|----------------------------------|----------------------------|---------|------------------------------|---------|-------------------------------|---------|---------------------------------------------------------|---------|
| Variables                        | Overall mortality (n=1492) |         | 12-month mortality (n= 1492) |         | Disease progression (n= 1383) |         | Change in FVC percent predicted over 12 months (n=891)  |         |
|                                  | R <sup>2</sup> (%)         | P value | R <sup>2</sup> (%)           | P value | R <sup>2</sup> (%)            | P value | R <sup>2</sup> (%)                                      | P value |
| Design (cohort vs. RCT)          | 0.00                       | 0.747   | 0.00                         | 0.388   | 0.00                          | 0.159   | 0.00                                                    | 0.988   |
| Assay (ELISA vs. other)          | 18.45                      | 0.088   | 25.4                         | 0.075   | 100                           | 0.013   | 0.00                                                    | 0.235   |
| Sample (Serum vs. plasma)        | 0.00                       | 0.98    | 0.00                         | 0.483   | 71.35                         | 0.1875  | 0.00                                                    | 0.502   |
| IPF consensus (2011 vs. other)   | 0.00                       | 0.983   | 0.00                         | 0.87    | 100                           | 0.05    | N/A                                                     | N/A     |
| Centre (single vs. multi)        | 9.05                       | 0.1995  | 0.00                         | 0.293   | 6.23                          | 0.418   | 91.14                                                   | 0.195   |
| Publication type (peer reviewed) | 0.00                       | 0.922   | 0.00                         | 0.893   | 47.51                         | 0.212   | 0.00                                                    | 0.659   |
| Change in MMP-7 over 3 months    |                            |         |                              |         |                               |         |                                                         |         |
| Variables                        | Overall mortality (n=498)  |         | 12-month mortality (n=498)   |         | Disease progression (n= 481)  |         | Change in FVC percent predicted over 12 months (n= 481) |         |
|                                  | R <sup>2</sup> (%)         | P value | R <sup>2</sup> (%)           | P value | R <sup>2</sup> (%)            | P value | R <sup>2</sup> (%)                                      | P value |
| Design (cohort vs. RCT)          | 0.00                       | 0.916   | 0.00                         | 0.78    | 82.84                         | 0.62    | 0.00                                                    | 0.716   |
| Assay (ELISA vs. other)          | 0.00                       | 0.753   | 84.97                        | 0.07    | 0.00                          | 0.05    | 0.00                                                    | 0.435   |
| Sample (Serum vs. plasma)        | 0.00                       | 0.56    | 0.00                         | 0.557   | 19.2                          | 0.662   | 0.00                                                    | 0.716   |
| IPF consensus (2011 vs. other)   | N/A                        | N/A     | N/A                          | N/A     | N/A                           | N/A     | N/A                                                     | N/A     |
| Centre (single vs. multi)        | N/A                        | N/A     | N/A                          | N/A     | N/A                           | N/A     | N/A                                                     | N/A     |
| Publication type (peer reviewed) | N/A                        | N/A     | N/A                          | N/A     | N/A                           | N/A     | N/A                                                     | N/A     |

**Supplementary Table S3** - Results of meta-regression for variables assessed separated by study outcomes. Sample sizes for each outcome shown (n). R<sup>2</sup> and p values from meta-regression shown where applicable.

N/A, not applicable.

| Outcome                                            | The GRADE domains                                                                                                                    | Ratings for quality of evidence                                                                                                                                                                                                                                                                                                                                                                                                                                                                                                                                                                                                                                                                                                                                                                |
|----------------------------------------------------|--------------------------------------------------------------------------------------------------------------------------------------|------------------------------------------------------------------------------------------------------------------------------------------------------------------------------------------------------------------------------------------------------------------------------------------------------------------------------------------------------------------------------------------------------------------------------------------------------------------------------------------------------------------------------------------------------------------------------------------------------------------------------------------------------------------------------------------------------------------------------------------------------------------------------------------------|
| <b>Baseline MMP-7</b>                              |                                                                                                                                      |                                                                                                                                                                                                                                                                                                                                                                                                                                                                                                                                                                                                                                                                                                                                                                                                |
| Overall mortality (10 studies; 1492 participants)  | <p>Risk of bias</p> <p>Imprecision</p> <p>Inconsistency</p> <p>Indirectness</p> <p>Publication bias</p> <p>Certainty of evidence</p> | <p>All studies included well-defined participants diagnosed according to international consensus guidelines. Exposure and outcomes were measured objectively and consistently for all participants. Covariates were adjusted for using IPD. Follow up was sufficiently long to enable outcomes to occur.</p> <p>Effect sizes in most studies favour MMP-7 as a marker of mortality.</p> <p>Substantial heterogeneity not explained by variability in the factors assessed</p> <p>No serious indirectness. All patients had IPF according to consensus criteria and were untreated. MMP-7 was measured at baseline in all studies, and overall mortality measured from IPD.</p> <p>No publication bias as indicated by funnel plots and Egger's tests</p> <p>Moderate certainty of evidence</p> |
| 12-month mortality (10 studies; 1492 participants) | <p>Risk of bias</p> <p>Imprecision</p> <p>Inconsistency</p> <p>Indirectness</p> <p>Publication bias</p>                              | <p>All studies included well-defined participants diagnosed according to international consensus guidelines. Exposure and outcomes were measured objectively and consistently for all participants. Covariates were adjusted for using IPD. Follow up was sufficiently long to enable outcomes to occur.</p> <p>Imprecision present with wide confidence interval of 0.99-1.78.</p> <p>Substantial heterogeneity not explained by variability in the factors assessed</p> <p>No serious indirectness. All patients had IPF according to consensus criteria and were untreated. MMP-7 was measured at baseline in all studies, and 12-month mortality measured from IPD.</p> <p>No publication bias as indicated by funnel plots and Egger's tests</p>                                          |



|                                                          | Certainty of evidence                                                                                                                | Moderate certainty of evidence                                                                                                                                                                                                                                                                                                                                                                                                                                                                                                                                                                                                                                                                                                                                                                                                                                                                                                                                                        |
|----------------------------------------------------------|--------------------------------------------------------------------------------------------------------------------------------------|---------------------------------------------------------------------------------------------------------------------------------------------------------------------------------------------------------------------------------------------------------------------------------------------------------------------------------------------------------------------------------------------------------------------------------------------------------------------------------------------------------------------------------------------------------------------------------------------------------------------------------------------------------------------------------------------------------------------------------------------------------------------------------------------------------------------------------------------------------------------------------------------------------------------------------------------------------------------------------------|
| Disease progression (10 studies; 1383 participants)      | <p>Risk of bias</p> <p>Imprecision</p> <p>Inconsistency</p> <p>Indirectness</p> <p>Publication bias</p> <p>Certainty of evidence</p> | <p>All studies included well-defined participants diagnosed according to international consensus guidelines. Exposure was measured objectively and consistently for all participants. Disease progression definition was standardised. Covariates were adjusted for using IPD. Follow up was sufficiently long to enable outcomes to occur.</p> <p>Effect sizes consistently favour MMP-7 as a prognostic marker, although confidence intervals commonly cross 1. Overall estimate has appropriately narrow confidence interval supporting MMP-7 as a biomarker of disease progression.</p> <p>No heterogeneity demonstrated.</p> <p>No serious indirectness. All patients had IPF according to consensus criteria and were untreated. MMP-7 was measured at baseline in all studies, and disease progression standardised using IPD.</p> <p>No publication bias as indicated by funnel plots and Egger's tests</p> <p>High certainty of evidence.</p>                                |
| Change in FVC at 12 months (8 studies; 891 participants) | <p>Risk of bias</p> <p>Imprecision</p> <p>Inconsistency</p> <p>Indirectness</p> <p>Publication bias</p> <p>Certainty of evidence</p> | <p>All studies included well-defined participants diagnosed according to international consensus guidelines. Exposure was measured objectively and consistently for all participants. Change in FVC was measured objectively and consistently for all participants. Covariates were adjusted for using IPD. Follow up was sufficiently long to enable outcomes to occur.</p> <p>The majority of the studies show MMP-7 to result in a negative change in FVC at 12 months, although confidence intervals cross 0 in all individual studies. Overall confidence interval does not cross 0.</p> <p>No evidence of heterogeneity</p> <p>No serious indirectness. All patients had IPF according to consensus criteria and were untreated. MMP-7 was measured at baseline in all studies and change in FVC standardised using IPD.</p> <p>No obvious funnel plot asymmetry, although unable to assess statistically due to small number of studies</p> <p>High certainty of evidence.</p> |

| Three-month MMP-7 change                         |                       |                                                                                                                                                                                                                                                                                                       |
|--------------------------------------------------|-----------------------|-------------------------------------------------------------------------------------------------------------------------------------------------------------------------------------------------------------------------------------------------------------------------------------------------------|
| Overall mortality (4 studies; 498 participants)  | Risk of bias          | All studies included well-defined participants diagnosed according to international consensus guidelines. Exposure and outcomes were measured objectively and consistently for all participants. Covariates were adjusted for using IPD. Follow up was sufficiently long to enable outcomes to occur. |
|                                                  | Imprecision           | Wide confidence intervals in individual studies but narrow confidence interval for overall effect size (no effect)                                                                                                                                                                                    |
|                                                  | Inconsistency         | Substantial heterogeneity not explained by variability in the factors assessed                                                                                                                                                                                                                        |
|                                                  | Indirectness          | No serious indirectness. All patients had IPF according to consensus criteria and were untreated. MMP-7 was measured at baseline in all studies, and overall mortality measured from IPD.                                                                                                             |
|                                                  | Publication bias      | No obvious funnel plot asymmetry, although unable to assess statistically due to small number of studies                                                                                                                                                                                              |
|                                                  | Certainty of evidence | Moderate certainty of evidence                                                                                                                                                                                                                                                                        |
| 12-month mortality (4 studies; 498 participants) | Risk of bias          | All studies included well-defined participants diagnosed according to international consensus guidelines. Exposure and outcomes were measured objectively and consistently for all participants. Covariates were adjusted for using IPD. Follow up was sufficiently long to enable outcomes to occur. |
|                                                  | Imprecision           | Wide confidence interval in individual studies but narrow confidence interval for overall effect size (no effect)                                                                                                                                                                                     |
|                                                  | Inconsistency         | Heterogeneity not explained by variability in the factors assessed                                                                                                                                                                                                                                    |
|                                                  | Indirectness          | No serious indirectness. All patients had IPF according to consensus criteria and were untreated. MMP-7 was measured at baseline in all studies, and 12-month mortality measured from IPD.                                                                                                            |
|                                                  | Publication bias      | No obvious funnel plot asymmetry, although unable to assess statistically due to small number of studies                                                                                                                                                                                              |
|                                                  | Certainty of evidence | Moderate certainty of evidence                                                                                                                                                                                                                                                                        |

|                                                          |                       |                                                                                                                                                                                                                                                                                                                                                                       |
|----------------------------------------------------------|-----------------------|-----------------------------------------------------------------------------------------------------------------------------------------------------------------------------------------------------------------------------------------------------------------------------------------------------------------------------------------------------------------------|
| Disease progression (4 studies; 481 participants)        | Risk of bias          | All studies included well-defined participants diagnosed according to international consensus guidelines. Exposure and outcomes were measured objectively and consistently for all participants. Covariates were adjusted for using IPD. Follow up was sufficiently long to enable outcomes to occur.                                                                 |
|                                                          | Imprecision           | Wide confidence interval in individual studies but narrow confidence interval for overall effect size (no effect)                                                                                                                                                                                                                                                     |
|                                                          | Inconsistency         | No significant heterogeneity                                                                                                                                                                                                                                                                                                                                          |
|                                                          | Indirectness          | No serious indirectness. All patients had IPF according to consensus criteria and were untreated. MMP-7 was measured at baseline in all studies, and overall mortality measured from IPD.                                                                                                                                                                             |
|                                                          | Publication bias      | No obvious funnel plot asymmetry, although unable to assess statistically due to small number of studies                                                                                                                                                                                                                                                              |
|                                                          | Certainty of evidence | High certainty of evidence                                                                                                                                                                                                                                                                                                                                            |
| Change in FVC at 12 months (4 studies; 481 participants) | Risk of bias          | All studies included well-defined participants diagnosed according to international consensus guidelines. Exposure was measured objectively and consistently for all participants. Change in FVC was measured objectively and consistently for all participants. Covariates were adjusted for using IPD. Follow up was sufficiently long to enable outcomes to occur. |
|                                                          | Imprecision           | Wide confidence interval in individual studies but narrow confidence interval for overall effect size (no effect)                                                                                                                                                                                                                                                     |
|                                                          | Inconsistency         | Inconsistency present across results from studies                                                                                                                                                                                                                                                                                                                     |
|                                                          | Indirectness          | No serious indirectness. All patients had IPF according to consensus criteria and were untreated. MMP-7 was measured at baseline in all studies and change in FVC standardised using IPD.                                                                                                                                                                             |
|                                                          | Publication bias      | No obvious funnel plot asymmetry, although unable to assess statistically due to small number of studies                                                                                                                                                                                                                                                              |
|                                                          | Certainty of evidence | Moderate certainty of evidence.                                                                                                                                                                                                                                                                                                                                       |

**Supplementary Table S4** – GRADE (Grading of Recommendations, Assessment, Development and Evaluations) approach to rate the quality of evidence for the prognostic factor MMP-7

| Author (year)                         | Sample size | Follow up (months) | Effect size (Variance)      | Level of adjustment | Effect size reported for       |
|---------------------------------------|-------------|--------------------|-----------------------------|---------------------|--------------------------------|
| <b>MMP-7 (IPD unavailable)</b>        |             |                    |                             |                     |                                |
| Sokai (2015)                          | 57          | 15                 | Not significant (NR)        | NR                  | NR                             |
| Peljto (2013)                         | 438         | 19                 | 2.18 (95% CI 1.1-4.32)      | b,d,e,h             | bio > or < 5.7ng/mL            |
| <b>SP-A</b>                           |             |                    |                             |                     |                                |
| Kinder (2009)                         | 82          | 36                 | HR 3.27 (95% CI 1.49-7.17)  | a,b,c,d,e,g         | per bio SD                     |
| Doubkova (2016)                       | 18          | NR                 | Not significant (NR)        | x                   | bio > or < median (98.1ng/mL)  |
| Hamai (2016)                          | 65          | 31                 | HR 1.01 (95% CI 0.99-1.02)  | x                   | continuous                     |
| <b>SP-D</b>                           |             |                    |                             |                     |                                |
| Kinder (2009)                         | 82          | 36                 | HR 2.04 (95% CI 0.99-4.22)  | a,b,c,d,e,g         | per bio SD                     |
| Collard (2010)                        | 67          | NR                 | OR 1.23 (95% CI 0.36-4.21)  | "Bivariate" - NR    | log change in bio              |
| Doubkova (2016)                       | 18          | NR                 | Not significant (NR)        | x                   | bio > or < median (623.1ng/mL) |
| Hamai (2016)                          | 65          | 31                 | HR 1.00 (95% CI 0.99-1.002) | x                   | continuous                     |
| Maher (2017) - <i>Validation</i>      | 206         | 36                 | HR 2.72 (95% CI 1.65-4.48)  | x                   | bio > or < 38.7ng/mL           |
| <b>CCL-18</b>                         |             |                    |                             |                     |                                |
| Prasse (2009)                         | 72          | 24                 | HR 7.98 (95% CI 2.49-25.51) | a,b,c,d,e           | bio > or < 150ng/mL            |
| Hamai (2016)                          | 65          | 31                 | HR 1.007 (95% CI 0.99-1.01) | X                   | continuous                     |
| Neighbors (2018) – <i>Test</i>        | 123         | 12                 | OR 4.4 (95% CI 1.13-17.15)  | x                   | bio ≥ or < median              |
| Neighbors (2018) – <i>Replication</i> | 237         | 12                 | OR 3.37 (95% CI 1.17-9.67)  | x                   | bio ≥ or < median              |
| <b>CXCL-13</b>                        |             |                    |                             |                     |                                |
| Guo (2020)                            | 126         | 60                 | HR 1.03 (95% CI 1.02-1.06)  | a                   | bio > or < 62pg/mL             |

|                                       |     |     |                              |                  |                             |
|---------------------------------------|-----|-----|------------------------------|------------------|-----------------------------|
| Vuga (2014)                           | 95  | >24 | HR 14.9 (95% CI 1.1-197.2)   | a,b,d,e          | bio > or < highest quartile |
| Neighbors (2018) – <i>Test</i>        | 123 | 12  | OR 2.95 (95% CI 0.76-11.46)  | x                | bio ≥ or < median           |
| Neighbors (2018) – <i>Replication</i> | 237 | 12  | OR 6.17 (95% CI 1.75-21.8)   | x                | bio ≥ or < median           |
| <b>KL-6</b>                           |     |     |                              |                  |                             |
| Collard (2010)                        | 67  | NR  | OR 0.41 (95% CI 0.06-2.93)   | “Bivariate” - NR | bio log change              |
| Hamai (2016)                          | 65  | 31  | HR 1.001 (95% CI 1.00-1.002) | a,b,c            | continuous                  |
| Guo (2020)                            | 126 | 60  | HR 1.83 (95% CI 1.01-3.69)   | a                | bio > or < 800U/mL          |
| <b>IL-8</b>                           |     |     |                              |                  |                             |
| Richards (2012) – <i>Derivation</i>   | 140 | 22  | HR 2.4 (95% CI 1.2-4.79)     | a,b,d            | bio > or < 0.0029           |
| Richards (2012) – <i>Validation</i>   | 101 | 17  | HR 2.3 (95% CI 0.94-5.64)    | a,b,d            | bio > or < 0.0097           |
| Papiris (2018)                        | 41  | 12  | OR 1.067 (95% CI 1.01-1.12)  | x                | per increase of 1pg/mL      |
| <b>CA19-9</b>                         |     |     |                              |                  |                             |
| Maher (2017) – <i>Validation</i>      | 206 | 36  | HR 2.95 (95% CI 1.82-4.78)   | x                | bio > or < 22 U/mL          |
| <b>CA-125</b>                         |     |     |                              |                  |                             |
| Maher (2017) – <i>Validation</i>      | 206 | 36  | HR 3.01 (95% CI 1.64-5.54)   | x                | bio > or < 12 U/mL          |
| <b>LOXL2</b>                          |     |     |                              |                  |                             |
| Chien (2014) – <i>ARTEMIS</i>         | 69  | 24  | HR 1.87 (95% CI 0.28-12.45)  | d,e,f,h          | bio > or ≤ 800pg/mL         |
| Chien (2014) – <i>GAP</i>             | 104 | 24  | HR 2.28 (95% CI 1.18-4.38)   | b                | bio > or ≤ 700pg/mL         |
| <b>Periostin</b>                      |     |     |                              |                  |                             |
| Okamoto (2011)                        | 77  | 36  | Not significant (NR)         | x                | NR                          |
| Neighbors (2018) - <i>Test</i>        | 123 | 12  | OR 3.05 (95% CI 0.79-11.88)  | x                | bio ≥ or < median           |
| Neighbors (2018) – <i>Replication</i> | 237 | 12  | OR 1.91 (95% CI 0.72-5.05)   | x                | bio ≥ or < median           |
| <b>YKL-40</b>                         |     |     |                              |                  |                             |

|                                         |     |    |                            |       |                                |
|-----------------------------------------|-----|----|----------------------------|-------|--------------------------------|
| Neighbors (2018) – <i>Test</i>          | 123 | 12 | OR 1.77 (95% CI 0.53-5.92) | x     | bio ≥ or < median              |
| Neighbors (2018) – <i>Replication</i>   | 237 | 12 | OR 2.7 (95% CI 0.94-7.75)  | x     | bio ≥ or < median              |
| <b>ICAM-1</b>                           |     |    |                            |       |                                |
| Richards (2012) - <i>Derivation</i>     | 140 | 22 | HR 2.6 (95% CI 1.43-4.73)  | a,b,d | bio > or < 202.5ng/mL          |
| Richards (2012) – <i>Validation</i>     | 101 | 17 | HR 2.8 (95% CI 1.36-5.76)  | a,b,d | bio > or < 300ng/mL            |
| <b>ECM neoepitopes</b>                  |     |    |                            |       |                                |
| Jenkins (2015) – <i>Discovery BGM</i>   | 55  | 26 | HR 1.17 (95% CI 0.53-2.58) | x     | two-fold increase in bio value |
| Jenkins (2015) – <i>Validation BGM</i>  | 134 | 21 | HR 1.34 (95% CI 0.92-1.97) | x     | two-fold increase in bio value |
| Jenkins (2015) – <i>Discovery C1M</i>   | 55  | 26 | HR 1.21 (95% CI 0.66-2.22) | x     | two-fold increase in bio value |
| Jenkins (2015) – <i>Validation C1M</i>  | 134 | 21 | HR 1.62 (95% CI 1.14-2.31) | x     | two-fold increase in bio value |
| Jenkins (2015) – <i>Discovery C3A</i>   | 55  | 26 | HR 1.34 (95% CI 0.95-1.88) | x     | two-fold increase in bio value |
| Jenkins (2015) – <i>Validation C3A</i>  | 134 | 21 | HR 1.91 (95% CI 1.06-3.46) | x     | two-fold increase in bio value |
| Jenkins (2015) – <i>Discovery C3M</i>   | 55  | 26 | HR 2.18 (95% CI 0.95-5.00) | x     | two-fold increase in bio value |
| Jenkins (2015) – <i>Validation C3M</i>  | 134 | 21 | HR 1.56 (95% CI 0.94-2.59) | x     | two-fold increase in bio value |
| Jenkins (2015) – <i>Discovery C5M</i>   | 55  | 26 | HR 1.66 (95% CI 0.95-2.91) | x     | two-fold increase in bio value |
| Jenkins (2015) – <i>Validation C5M</i>  | 134 | 21 | HR 1.07 (95% CI 0.66-1.72) | x     | two-fold increase in bio value |
| Jenkins (2015) – <i>Discovery C6M</i>   | 55  | 26 | HR 1.49 (95% CI 0.86-2.56) | x     | two-fold increase in bio value |
| Jenkins (2015) – <i>Validation C6M</i>  | 134 | 21 | HR 1.39 (95% CI 0.93-2.06) | x     | two-fold increase in bio value |
| Jenkins (2015) – <i>Discovery CRPM</i>  | 55  | 26 | HR 3.74 (95% CI 1.46-9.58) | x     | two-fold increase in bio value |
| Jenkins (2015) – <i>Validation CRPM</i> | 134 | 21 | HR 1.87 (95% CI 0.98-3.56) | x     | two-fold increase in bio value |
| Jenkins (2015) – <i>Discovery ELM</i>   | 55  | 26 | HR 0.96 (95% CI 0.48-1.92) | x     | two-fold increase in bio value |
| Jenkins (2015) – <i>Discovery ELM2</i>  | 55  | 26 | HR 0.96 (95% CI 0.75-1.24) | x     | two-fold increase in bio value |

|                                        |     |    |                            |     |                                |
|----------------------------------------|-----|----|----------------------------|-----|--------------------------------|
| Jenkins (2015) – <i>Discovery P3NP</i> | 55  | 26 | HR 1.48 (95% CI 0.67-3.27) | x   | two-fold increase in bio value |
| Jenkins (2015) – <i>Discovery VICM</i> | 55  | 26 | HR 1.11 (95% CI 0.83-1.49) | x   | two-fold increase in bio value |
| <b>Collagen synthesis peptides</b>     |     |    |                            |     |                                |
| Organ (2019) <b>P1NP</b>               | 145 | 34 | HR 0.81 (95% CI 0.6-1.11)  | d,e | two-fold increase in bio value |
| Organ (2019) <b>PRO-C3</b>             | 145 | 34 | HR 1.2 (95% CI 0.74-1.93)  | d,e | two-fold increase in bio value |
| Hoyer (2020) <b>PRO-C3</b>             | 184 | 36 | HR 2.32 (95% CI 1.33-4.04) | a   | continuous                     |
| Organ (2019) <b>PRO-C6</b>             | 145 | 34 | HR 1.11 (95% CI 0.57-2.16) | d,e | two-fold increase in bio value |
| Hoyer (2020) <b>PRO-C6</b>             | 184 | 36 | HR 2.18 (95% CI 0.74-4.35) | a   | continuous                     |
| Organ (2019) <b>P1NP:C1M</b>           | 145 | 34 | HR 0.77 (95% CI 0.6-0.99)  | d,e | two-fold increase in bio value |
| Organ (2019) <b>PRO-C3:C3M</b>         | 145 | 34 | HR 1.17 (95% CI 0.77-1.79) | d,e | two-fold increase in bio value |
| Organ (2019) <b>PRO-C6:C6M</b>         | 145 | 34 | HR 0.86 (95% CI 0.59-1.26) | d,e | two-fold increase in bio value |
| Hoyer (2020) <b>PRO-C6</b>             | 184 | 36 | HR 1.8 (95% CI 0.74-4.35)  | a   | continuous                     |

**Supplementary Table S5** – Studies reporting mortality outcomes

x=no adjustments, a=age, b=gender, c=smoking, d=FVC e=DLCO, f= 6MWT, g=race, h=medication

bio, biomarker; HR, hazard ratio; IPD, individual participant data; NR, not reported; OR, odds ratio

| Author (year)                          | Sample size | Follow up (months) | Effect size (Variance)      | Level of adjustment | Effect size reported for           |
|----------------------------------------|-------------|--------------------|-----------------------------|---------------------|------------------------------------|
| <b>SP-D</b>                            |             |                    |                             |                     |                                    |
| Maher (2017) - <i>Discovery</i>        | 106         | 36                 | HR 1.01 (95% CI 0.97-1.06)  | x                   | rising vs stable bio over 3 months |
| Maher (2017) - <i>Validation</i>       | 206         | 36                 | HR 0.99 (95% CI 0.59-1.67)  | a,b,c,d             | rising vs stable bio over 3 months |
| <b>CA19-9</b>                          |             |                    |                             |                     |                                    |
| Maher (2017) - <i>Discovery</i>        | 106         | 36                 | HR 1.02 (95% CI 1.00-1.05)  | X                   | rising vs stable bio over 3 months |
| Maher (2017) - <i>Validation</i>       | 206         | 36                 | HR 1.39 (95% CI 0.79-2.46)  | a,b,c,d             | rising vs stable bio over 3 months |
| <b>CA-125</b>                          |             |                    |                             |                     |                                    |
| Maher (2017) - <i>Discovery</i>        | 106         | 36                 | HR 1.77 (95% CI 1.39-2.26)  | x                   | rising vs stable bio over 3 months |
| Maher (2017) - <i>Validation</i>       | 206         | 36                 | HR 2.39 (95% CI 1.4-4.08)   | a,b,c,d             | rising vs stable bio over 3 months |
| <b>ICAM-1</b>                          |             |                    |                             |                     |                                    |
| Maher (2017) - <i>Discovery</i>        | 106         | 36                 | HR 1.002 (95% CI 0.99-1.01) | x                   | rising vs stable bio over 3 months |
| <b>IGFBP-2</b>                         |             |                    |                             |                     |                                    |
| Maher (2017) - <i>Discovery</i>        | 106         | 36                 | HR 1.02 (95% CI 1.002-1.03) | x                   | rising vs stable bio over 3 months |
| <b>IL-8</b>                            |             |                    |                             |                     |                                    |
| Maher (2017) - <i>Discovery</i>        | 106         | 36                 | HR 1.02 (95% CI 0.98-1.07)  | x                   | rising vs stable bio over 3 months |
| <b>ECM neoepitopes</b>                 |             |                    |                             |                     |                                    |
| Jenkins (2015) - <i>Validation BGM</i> | 134         | 21                 | HR 1.07 (95% CI 1.00-1.15)  | a,c,d,e             | rising vs stable bio over 3 months |
| Organ (2019) <b>BGM</b>                | 145         | 34                 | HR 1.41 (95% CI 0.8-2.47)   | a,b,c               | rising vs stable bio over 3 months |
| Jenkins (2015) - <i>Validation C1M</i> | 134         | 21                 | HR 1.01 (95% CI 1.00-1.02)  | a,c,d,e             | rising vs stable bio over 3 months |
| Organ (2019) <b>C1M</b>                | 145         | 34                 | HR 1.84 (95% CI 1.03-3.27)  | a,b,c               | rising vs stable bio over 3 months |



|                                            |     |    |                            |         |                                    |
|--------------------------------------------|-----|----|----------------------------|---------|------------------------------------|
| Jenkins (2015) –Validation <b>C3A</b>      | 134 | 21 | HR 1.05 (95% CI 1.01-1.1)  | a,c,d,e | rising vs stable bio over 3 months |
| Jenkins (2015) –Validation <b>C3M</b>      | 134 | 21 | HR 1.1 (95% CI 1.04-1.17)  | a,c,d,e | rising vs stable bio over 3 months |
| Organ (2019)<br><b>C3M</b>                 | 145 | 34 | HR 2.44 (95% CI 1.39-4.31) | a,b,c   | rising vs stable bio over 3 months |
| Jenkins (2015) –Validation <b>C5M</b>      | 134 | 21 | HR 1.00 (95% CI 1.00-1.00) | a,c,d,e | rising vs stable bio over 3 months |
| Jenkins (2015) –Validation <b>C6M</b>      | 134 | 21 | HR 1.04 (95% CI 1.01-1.08) | a,c,d,e | rising vs stable bio over 3 months |
| Organ (2019) <b>C6M</b>                    | 145 | 34 | HR 2.19 (95% CI 1.25-3.82) | a,b,c   | rising vs stable bio over 3 months |
| Jenkins (2015) –Validation<br><b>CRPM</b>  | 134 | 21 | HR 1.33 (95% CI 1.1-1.6)   | a,c,d,e | rising vs stable bio over 3 months |
| Organ (2019) <b>CRPM</b>                   | 145 | 34 | HR 2.13 (95% CI 1.21-3.75) | a,b,c   | rising vs stable bio over 3 months |
| Jenkins (2015) –<br>Validation <b>VICM</b> | 55  | 26 | HR 1.01 (95% CI 0.99-1.03) | a,c,d,e | rising vs stable bio over 3 months |
| <b>Collagen synthesis peptides</b>         |     |    |                            |         |                                    |
| Organ (2019) <b>P1NP</b>                   | 145 | 34 | HR 0.76 (95% CI 0.44-1.3)  | a,b,c   | rising vs stable bio over 3 months |
| Organ (2019) <b>PRO-C3</b>                 | 145 | 34 | HR 1.62 (95% CI 0.95-2.79) | a,b,c   | rising vs stable bio over 3 months |
| Organ (2019) <b>PRO-C6</b>                 | 145 | 34 | HR 1.14 (95% CI 0.67-1.93) | a,b,c   | rising vs stable bio over 3 months |
| Organ (2019)<br><b>P1NP:C1M</b>            | 145 | 34 | HR 0.73 (95% CI 0.41-1.29) | a,b,c   | rising ratio levels                |
| Organ (2019)<br><b>PRO-C3:C3M</b>          | 145 | 34 | HR 0.83 (95% CI 0.49-1.43) | a,b,c   | rising ratio levels                |
| Organ (2019)<br><b>PRO-C6:C6M</b>          | 145 | 34 | HR 0.55 (95% CI 0.32-0.95) | a,b,c   | rising ratio levels                |

**Supplementary Table S6** – Studies reporting short term biomarkers change and their association with mortality

x=no adjustments, a=age, b=gender, c=smoking, d=FVC e=DLCO, f= 6MWT, g=race, h=medication  
bio, biomarker; HR, hazard ratio.

| Author (year)                       | Sample size | Timepoint of outcome (months) | Disease progression definition                                                                         | Effect size (Variance)        | Level of adjustment | Effect size reported for                  |
|-------------------------------------|-------------|-------------------------------|--------------------------------------------------------------------------------------------------------|-------------------------------|---------------------|-------------------------------------------|
| <b>MMP-7 (IPD unavailable)</b>      |             |                               |                                                                                                        |                               |                     |                                           |
| Sokai (2015)                        | 57          | 6                             | FVC decline $\geq 10\%$ or DL <sub>CO</sub> $\geq 15\%$ decline or respiratory failure or death        | Not significant (NR)          | NR                  | NR                                        |
| Bauer (2017)                        | 211         | 19                            | FVC decline $\geq 10\%$ or DL <sub>CO</sub> $\geq 15\%$ decline or respiratory failure or death        | HR 2.2 (95% CI 1.4-3.7)       | NR                  | bio < or $\geq 3.8$ ng/mL                 |
| <b>SP-A</b>                         |             |                               |                                                                                                        |                               |                     |                                           |
| Raghu (2018)                        | 130         | 12                            | FVC decrease $\geq 10\%$ predicted or DL <sub>CO</sub> decrease > 15% or lung transplantation or death | AUROC 0.61 (90% CI 0.52-0.7)  | NR                  | NR                                        |
| <b>SP-D</b>                         |             |                               |                                                                                                        |                               |                     |                                           |
| Collard (2010)                      | 67          | NR                            | Acute exacerbation                                                                                     | 361ng/mL vs 294ng/mL (p=0.01) | x                   | median bio in event and non-event group   |
| Maher (2017) <i>Discovery</i>       | 104         | 12                            | All-cause mortality or FVC decline $\geq 10\%$                                                         | GR 1.35 (95% CI 1.1-1.649)    | x                   | bio level in progressive vs. stable group |
| Maher (2017) <i>Validation</i>      | 204         | 12                            | All-cause mortality or FVC decline $\geq 10\%$                                                         | GR 1.35 (95% CI 1.12-1.62)    | x                   | bio level in progressive vs. stable group |
| Raghu (2018)                        | 130         | 12                            | FVC decrease $\geq 10\%$ predicted or DL <sub>CO</sub> decrease > 15% or lung transplantation or death | AUROC 0.62 (90% CI 0.53-0.7)  | NR                  | NR                                        |
| <b>CCL-18</b>                       |             |                               |                                                                                                        |                               |                     |                                           |
| Prasse (2009)                       | 67          | 24                            | FVC decline $\geq 10\%$ predicted or death                                                             | OR 6.75 (95% CI 2.52-18.1)    | x                   | bio < or > 150ng/mL                       |
| Ohshimo (2014)                      | 77          | 36                            | Acute exacerbation                                                                                     | HR 2.92 (95% CI 0.76-11.4)    | x                   | bio > or < 212ng/mL                       |
| Neighbors (2018) <i>Test</i>        | 123         | 12                            | FVC $\geq 10\%$ absolute decline, 50m decline in 6MWT or death                                         | HR 1.64 (95% CI 1.04-2.83)    | x                   | 'high' vs 'low' bio                       |
| Neighbors (2018) <i>Replication</i> | 237         | 12                            | FVC $\geq 10\%$ absolute decline, 50m decline in 6MWT or death                                         | HR 1.32 (95% CI 0.76-2.13)    | x                   | 'high' vs 'low' bio                       |
| Raghu (2018)                        | 130         | 12                            | FVC decrease $\geq 10\%$ predicted or DL <sub>CO</sub> decrease > 15% or lung transplantation or death | AUROC 0.62 (90% CI 0.54-0.71) | NR                  | bio > or < 150ng/mL                       |

| <b>CXCL-13</b>                      |     |    |                                                                                                 |                                 |         |                                           |
|-------------------------------------|-----|----|-------------------------------------------------------------------------------------------------|---------------------------------|---------|-------------------------------------------|
| Neighbors (2018) <i>Test</i>        | 123 | 12 | FVC ≥10% absolute decline, 50m decline in 6MWT or death                                         | HR 1.23 (95% CI 0.89-1.69)      | x       | 'high' vs 'low' bio                       |
| Neighbors (2018) <i>Replication</i> | 237 | 12 | FVC ≥10% absolute decline, 50m decline in 6MWT or death                                         | Not significant (NR)            | x       | 'high' vs 'low' bio                       |
| <b>KL-6</b>                         |     |    |                                                                                                 |                                 |         |                                           |
| Collard (2010)                      | 67  | NR | Acute exacerbation                                                                              | 1791 U/mL vs 895 U/mL (p=0.003) | x       | median bio in event and non-event group   |
| Ohshimo (2014)                      | 77  | 36 | Acute exacerbation                                                                              | HR 11.8 (95% CI 1.43-97.8)      | a,b,c,h | bio > or < 1300U/mL                       |
| Jiang (2018)                        | 20  | 12 | FVC decline ≥ 10% or DL <sub>CO</sub> decline ≥ 15%, or death                                   | OR 1.00 (95% CI 1.00-1.00)      | x       | continuous bio                            |
| Raghu (2018)                        | 130 | 12 | FVC decrease ≥10% predicted or DL <sub>CO</sub> decrease > 15% or lung transplantation or death | AUROC 0.6 (90% CI 0.51-0.68)    | NR      | NR                                        |
| <b>IL-8</b>                         |     |    |                                                                                                 |                                 |         |                                           |
| Richards (2012) <i>Derivation</i>   | 140 | 12 | FVC relative decline ≥ 10%                                                                      | HR 2.00 (95% CI 1.22-3.28)      | a,b,d   | bio > or < 0.0092ng/mL                    |
| Richards (2012) <i>Validation</i>   | 101 | 12 | FVC relative decline ≥ 10%                                                                      | HR 1.2 (95% CI 0.5-2.85)        | a,b,d   | bio > or < 0.0092ng/mL                    |
| Maher (2017) <i>Discovery</i>       | 104 | 12 | All-cause mortality or FVC decline ≥ 10%                                                        | GR 1.51 (95% CI 1.12-2.023)     | x       | bio level in progressive vs. stable group |
| <b>CA19-9</b>                       |     |    |                                                                                                 |                                 |         |                                           |
| Maher (2017) <i>Discovery</i>       | 104 | 12 | All-cause mortality or FVC decline ≥ 10%                                                        | GR 3.12 (95% CI 1.7-5.7)        | x       | bio level in progressive vs. stable group |
| Maher (2017) <i>Validation</i>      | 204 | 12 | All-cause mortality or FVC decline ≥ 10%                                                        | GR 2.42 (95% CI 1.6-3.65)       | x       | bio level in progressive vs. stable group |
| <b>CA125</b>                        |     |    |                                                                                                 |                                 |         |                                           |
| Maher (2017) <i>Discovery</i>       | 104 | 12 | All-cause mortality or FVC decline ≥ 10%                                                        | Not significant (NR)            | x       | bio level in progressive vs. stable group |
| Maher (2017) <i>Validation</i>      | 204 | 12 | All-cause mortality or FVC decline ≥ 10%                                                        | GR 1.26 (95% CI 1.05-1.51)      | x       | bio level in progressive vs. stable group |

| <b>LOXL2</b>                        |     |    |                                                                                                                                                     |                               |           |                                           |
|-------------------------------------|-----|----|-----------------------------------------------------------------------------------------------------------------------------------------------------|-------------------------------|-----------|-------------------------------------------|
| Chien (2014) <i>ARTEMIS</i>         | 69  | 24 | Mortality, hospitalisation or lung function decline (FVC $\geq$ 10% & DL <sub>CO</sub> $\geq$ 5%, or DL <sub>CO</sub> $\geq$ 15% and FVC $\geq$ 5%) | HR 5.41 (95% CI 1.65-17.73)   | d,e,f,h   | bio > or $\leq$ 800pg/mL                  |
| Chien (2014) <i>GAP</i>             | 70  | 24 | Mortality, hospitalisation or lung function decline (FVC $\geq$ 10% & DL <sub>CO</sub> $\geq$ 5%, or DL <sub>CO</sub> $\geq$ 15% and FVC $\geq$ 5%) | HR 1.78 (95% CI 1.01-3.11)    | x         | bio > or $\leq$ 700pg/mL                  |
| <b>Periostin</b>                    |     |    |                                                                                                                                                     |                               |           |                                           |
| Naik (2012)                         | 50  | 11 | Death, acute exacerbation, transplantation, relative FVC decline $\geq$ 10% or DL <sub>CO</sub> > 15%                                               | HR 1.47 (95% CI 1.03-2.1)     | a,b,c,d,e | per bio SD                                |
| Neighbors (2018) <i>Test</i>        | 123 | 12 | FVC $\geq$ 10% absolute decline, 50m decline in 6MWT or death                                                                                       | HR 2.08 (95% CI 1.24-3.47)    | x         | 'high' vs 'low' bio                       |
| Neighbors (2018) <i>Replication</i> | 237 | 12 | FVC $\geq$ 10% absolute decline, 50m decline in 6MWT or death                                                                                       | HR 1.75 (95% CI 0.87-2.84)    | x         | 'high' vs 'low' bio                       |
| Raghu (2018)                        | 130 | 12 | FVC decrease $\geq$ 10% predicted or DL <sub>CO</sub> decrease > 15% or lung transplantation or death                                               | AUROC 0.6 (90% CI 0.51-0.69)  | NR        | NR                                        |
| <b>YKL-40</b>                       |     |    |                                                                                                                                                     |                               |           |                                           |
| Neighbors (2018) <i>Test</i>        | 123 | 12 | FVC $\geq$ 10% absolute decline, 50m decline in 6MWT or death                                                                                       | HR 1.39 (95% CI 0.79-2.41)    | x         | 'high' vs 'low' bio                       |
| Neighbors (2018) <i>Replication</i> | 237 | 12 | FVC $\geq$ 10% absolute decline, 50m decline in 6MWT or death                                                                                       | Not significant (NR)          | x         | 'high' vs 'low' bio                       |
| Raghu (2018)                        | 130 | 12 | FVC decrease $\geq$ 10% predicted or DL <sub>CO</sub> decrease > 15% or lung transplantation or death                                               | AUROC 0.58 (90% CI 0.49-0.67) | NR        | NR                                        |
| <b>ICAM-1</b>                       |     |    |                                                                                                                                                     |                               |           |                                           |
| Richards (2012) <i>Derivation</i>   | 140 | 12 | FVC relative decline $\geq$ 10%                                                                                                                     | HR 1.6 (95% CI 1.00-2.56)     | a,b,d     | bio > or < 202.5ng/mL                     |
| Richards (2012) <i>Validation</i>   | 101 | 12 | FVC relative decline $\geq$ 10%                                                                                                                     | HR 2.2 (95% CI 1.21-4.01)     | a,b,d     | bio > or < 262ng/mL                       |
| Maher (2017) <i>Discovery</i>       | 104 | 12 | All-cause mortality or FVC decline $\geq$ 10%                                                                                                       | GR 1.29 (95% CI 1.02-1.65)    | x         | bio level in progressive vs. stable group |
| Raghu 2018                          | 130 | 12 | FVC decrease $\geq$ 10% predicted or DL <sub>CO</sub> decrease > 15% or lung transplantation or death                                               | AUROC 0.65 (90% CI 0.56-0.73) | NR        | NR                                        |
| <b>ECM neoepitopes</b>              |     |    |                                                                                                                                                     |                               |           |                                           |

|                                                     |     |    |                                               |                      |    |                                           |
|-----------------------------------------------------|-----|----|-----------------------------------------------|----------------------|----|-------------------------------------------|
| Jenkins (2015)<br><i>D+V cohort</i> <b>BGM</b>      | 186 | 12 | All-cause mortality or FVC decline $\geq$ 10% | Not significant (NR) | x  | bio level in progressive vs. stable group |
| Jenkins (2015)<br><i>D+V cohort</i> <b>C1M</b>      | 186 | 12 | All-cause mortality or FVC decline $\geq$ 10% | Not significant (NR) | x  | bio level in progressive vs. stable group |
| Jenkins (2015)<br><i>D+V cohort</i> <b>C3M</b>      | 186 | 12 | All-cause mortality or FVC decline $\geq$ 10% | P=0.011 (NR)         | x  | bio level in progressive vs. stable group |
| Jenkins (2015)<br><i>D+V cohort</i> <b>C5M</b>      | 186 | 12 | All-cause mortality or FVC decline $\geq$ 10% | Not significant (NR) | x  | bio level in progressive vs. stable group |
| Jenkins (2015)<br><i>D+V cohort</i> <b>C6M</b>      | 186 | 12 | All-cause mortality or FVC decline $\geq$ 10% | P=0.013 (NR)         | x  | bio level in progressive vs. stable group |
| Jenkins (2015)<br><i>D+V cohort</i> <b>CRPM</b>     | 186 | 12 | All-cause mortality or FVC decline $\geq$ 10% | P=0.014 (NR)         | x  | bio level in progressive vs. stable group |
| Jenkins (2015)<br><i>D+V cohort</i> <b>VICM</b>     | 186 | 12 | All-cause mortality or FVC decline $\geq$ 10% | P=0.033 (NR)         | x  | bio level in progressive vs. stable group |
| Jenkins (2015)<br><i>D+V cohort</i> <b>C3A</b>      | 186 | 12 | All-cause mortality or FVC decline $\geq$ 10% | P=0.003 (NR)         | x  | bio level in progressive vs. stable group |
| Jenkins (2015)<br><i>Discovery only</i> <b>P3NP</b> | 186 | 12 | All-cause mortality or FVC decline $\geq$ 10% | P=0.63 (NR)          | x  | bio level in progressive vs. stable group |
| Jenkins (2015)<br><i>Discovery only</i> <b>ELM</b>  | 186 | 12 | All-cause mortality or FVC decline $\geq$ 10% | P=0.55 (NR)          | x  | bio level in progressive vs. stable group |
| Jenkins (2015)<br><i>Discovery only</i> <b>ELM2</b> | 186 | 12 | All-cause mortality or FVC decline $\geq$ 10% | P=0.42 (NR)          | x  | bio level in progressive vs. stable group |
| Hoyer (2020)<br><b>PROC3</b>                        | 184 | 6  | All-cause mortality or FVC decline $\geq$ 10% | P=0.005 (NR)         | NR | NR                                        |
| Hoyer (2020)<br><b>PROC6</b>                        | 184 | 6  | All-cause mortality or FVC decline $\geq$ 10% | P=0.031 (NR)         | NR | NR                                        |

**Supplementary Table S7** – Studies reporting disease progression outcomes including definition of disease progression outcome used and effect sizes reported.

x=no adjustments, a=age, b=gender, c=smoking, d=FVC e=DL<sub>CO</sub>, f= 6MWT, g=race, h=medication, NR=not reported

bio, biomarker; AUROC; area under the receiver operating characteristics; DL<sub>CO</sub>, gas transfer for carbon monoxide; FVC, forced vital capacity; GR, group ratio; HR, hazard ratio; IPD, individual participant data; NR, not reported; OR, odds ratio; 6MWT, 6-minute walk test;

| Author (year)                         | Sample size | FVC change measured at (months) | Effect size (Variance)                | Level of adjustment | Effect size reported for                                    |
|---------------------------------------|-------------|---------------------------------|---------------------------------------|---------------------|-------------------------------------------------------------|
| <b>MMP-7 (IPD unavailable)</b>        |             |                                 |                                       |                     |                                                             |
| Bauer (2017)                          | 195         | 4                               | p=0.004 (NR)                          | x                   | baseline bio correlation with %pred FVC change              |
| <b>SP-A</b>                           |             |                                 |                                       |                     |                                                             |
| Doubkova (2016)                       | 18          | NR                              | 155.8 ng/mL vs 87.15 ng/mL;<br>p=0.01 | x                   | baseline bio in PFT “improvement” vs “stabilisation”        |
| <b>SP-D</b>                           |             |                                 |                                       |                     |                                                             |
| Doubkova (2016)                       | 18          | NR                              | 861.4ng/mL vs. 802.8ng/mL;<br>p=0.76  | x                   | baseline bio in PFT “improvement” vs “stabilisation”        |
| Kennedy (2015)                        | 13          | 6                               | r= -0.64 (95% CI -0.89 to -0.08)      | x                   | baseline bio correlation with %pred FVC change              |
| Ohta (2017)                           | 60          | 6-12                            | r= 0.09 (p>0.05)                      | x                   | baseline bio correlation with %pred FVC change              |
| <b>CCL-18</b>                         |             |                                 |                                       |                     |                                                             |
| Neighbors (2018) – <i>Test</i>        | 123         | 12                              | -3.1% (p=0.03)                        | x                   | %pred FVC change in baseline bio ≥ or < median (411.5ng/mL) |
| Neighbors (2018) – <i>Replication</i> | 237         | 12                              | -3.6% (p=0.004)                       | x                   | %pred FVC change in baseline bio ≥ or < median (458.6ng/mL) |
| Prasse (2009)                         | 67          | 6                               | r=0.54 (p<0.0001)                     | x                   | baseline bio correlation with %pred FVC change              |
| <b>CXCL-13</b>                        |             |                                 |                                       |                     |                                                             |
| Guo (2020)                            | 126         | 12                              | r= 0.56 (p<0.001)                     | x                   | baseline bio correlation with %pred FVC change              |
| Neighbors (2018) – <i>Test</i>        | 123         | 12                              | -3.2% (p=0.06)                        | x                   | %pred FVC change in baseline bio ≥ or < median (87.9ng/mL)  |
| Neighbors (2018) – <i>Replication</i> | 237         | 12                              | -3.7% (p=0.05)                        | x                   | %pred FVC change in baseline bio ≥ or < median (88.7ng/mL)  |
| <b>KL-6</b>                           |             |                                 |                                       |                     |                                                             |
| Guo (2020)                            | 126         | 12                              | r= 0.71 (p<0.001)                     | x                   | baseline bio correlation with %pred FVC change              |
| Ohta (2017)                           | 60          | 6-12                            | r= 0.09 (p>0.05)                      | x                   | baseline bio correlation with %pred FVC change              |
| Okamoto (2011)                        | 26          | 6                               | Not significant (NR)                  | x                   | baseline bio correlation with %pred FVC change              |

| <b>Periostin</b>                      |     |      |                   |   |                                                             |  |
|---------------------------------------|-----|------|-------------------|---|-------------------------------------------------------------|--|
| Neighbors (2018) – <i>Test</i>        | 123 | 12   | -3.6% (p<0.001)   | x | %pred FVC change in baseline bio ≥ or < median (67.8ng/mL)  |  |
| Neighbors (2018) – <i>Replication</i> | 237 | 12   | -2.5% (p=0.19)    | x | %pred FVC change in baseline bio ≥ or < median (65.4ng/mL)  |  |
| Ohta (2017)                           | 60  | 6-12 | r= -0.43 (p<0.01) | x | baseline bio correlation with %pred FVC change              |  |
| Okamoto (2011)                        | 26  | 6    | r= -0.50 (p<0.01) | x | baseline bio correlation with %pred FVC change              |  |
| <b>YKL-40</b>                         |     |      |                   |   |                                                             |  |
| Neighbors (2018) – <i>Test</i>        | 123 | 12   | -2.4% (p=0.04)    | x | %pred FVC change in baseline bio ≥ or < median (100.3ng/mL) |  |
| Neighbors (2018) – <i>Replication</i> | 237 | 12   | -1.5% (p=0.70)    | x | %pred FVC change in baseline bio ≥ or < median (109.5ng/mL) |  |

**Supplementary Table S8** – Studies reporting association with baseline biomarkers and change in forced vital capacity (FVC).  
 bio, biomarker; x = no adjustments

IPD, individual participant data.

| Author (year)                           | Sample size | Timepoint of outcome (months) | Disease progression definition                                                   | Effect size (Variance)     | Level of adjustment | Effect size reported for                                        |
|-----------------------------------------|-------------|-------------------------------|----------------------------------------------------------------------------------|----------------------------|---------------------|-----------------------------------------------------------------|
| <b>MMP-7 (IPD unavailable)</b>          |             |                               |                                                                                  |                            |                     |                                                                 |
| Bauer et al (2017)                      | 211         | “Study period”                | FVC $\geq$ 10% decline, DL <sub>CO</sub> $\geq$ 15%, acute exacerbation or death | OR 1.9 (95% CI 1.2-3.0)    | NR                  | Two-fold change in bio over 4 months                            |
| <b>SP-D</b>                             |             |                               |                                                                                  |                            |                     |                                                                 |
| Maher et al (2017)<br><i>Discovery</i>  | 106         | 12                            | All-cause mortality or FVC decline $\geq$ 10%                                    | p=0.029                    | x                   | rising vs stable bio over 3 months                              |
| Maher et al (2017)<br><i>Validation</i> | 206         | 12                            | All-cause mortality or FVC decline $\geq$ 10%                                    | Not significant (NR)       | x                   | rising vs stable bio over 3 months                              |
| <b>CXCL-13</b>                          |             |                               |                                                                                  |                            |                     |                                                                 |
| Vuga et al (2014)                       | 95          | >24                           | Respiratory failure                                                              | HR 7.2 (95% CI 1.3-40.0)   | x                   | bio “increase greatest vs. less increased” (time not specified) |
| <b>CA19-9</b>                           |             |                               |                                                                                  |                            |                     |                                                                 |
| Maher et al (2017)<br><i>Discovery</i>  | 106         | 12                            | All-cause mortality or FVC decline $\geq$ 10%                                    | p<0.001                    | x                   | rising vs stable bio over 3 months                              |
| Maher et al (2017)<br><i>Validation</i> | 206         | 12                            | All-cause mortality or FVC decline $\geq$ 10%                                    | Not significant (NR)       | x                   | rising vs stable bio over 3 months                              |
| <b>CA125</b>                            |             |                               |                                                                                  |                            |                     |                                                                 |
| Maher et al (2017)<br><i>Discovery</i>  | 106         | 12                            | All-cause mortality or FVC decline $\geq$ 10%                                    | p=0.041                    | x                   | rising vs stable bio over 3 months                              |
| Maher et al (2017)<br><i>Validation</i> | 206         | 12                            | All-cause mortality or FVC decline $\geq$ 10%                                    | p=0.0028                   | x                   | rising vs stable bio over 3 months                              |
| <b>KL-6</b>                             |             |                               |                                                                                  |                            |                     |                                                                 |
| Jiang et al (2018)                      | 20          | 12                            | FVC decline $\geq$ 10%, DL <sub>CO</sub> decline $\geq$ 15% or death             | OR 3.61 (95% CI 1.05-6.22) | a,b,c,d,e           | Change in KL-6 (not otherwise specified)                        |

**Supplementary Table S9** – Studies reporting short term biomarkers change and their association with disease progression

x=no adjustments, a=age, b=gender, c=smoking, d=FVC e=DL<sub>CO</sub>, f= 6MWT, g=race, h=medication, NR=not reported

bio, biomarker; DL<sub>CO</sub>, gas transfer for carbon monoxide; FVC, forced vital capacity; GR, group ratio; HR, hazard ratio; IPD, individual participant data; NR, not reported; OR, odds ratio



## References

1. Bauer Y, White ES, de Bernard S, et al. MMP-7 is a predictive biomarker of disease progression in patients with idiopathic pulmonary fibrosis. *ERJ Open Research* 2017;3(1) (no pagination)(00074-2016)
2. King TE, Jr., Brown KK, Raghu G, et al. BUILD-3: a randomized, controlled trial of bosentan in idiopathic pulmonary fibrosis. *American Journal of Respiratory & Critical Care Medicine* 2011;184(1):92-9.
3. Chien JW, Richards TJ, Gibson KF, et al. Serum lysyl oxidase-like 2 levels and idiopathic pulmonary fibrosis disease progression. *European Respiratory Journal* 2014;43(5):1430-8.
4. Raghu G, Behr J, Brown KK, et al. Treatment of idiopathic pulmonary fibrosis with ambrisentan: a parallel, randomized trial. *Ann Intern Med* 2013;158(9):641-9. doi: 10.7326/0003-4819-158-9-201305070-00003 [published Online First: 2013/05/08]
5. Genomic and Proteomic Analysis of Disease Progression in Idiopathic Pulmonary Fibrosis (IPF) (GAP) [Available from: <https://clinicaltrials.gov/ct2/show/NCT00373841>.
6. Collard HR, Calfee CS, Wolters PJ, et al. Plasma biomarker profiles in acute exacerbation of idiopathic pulmonary fibrosis. *American Journal of Physiology - Lung Cellular and Molecular Physiology* 2010;299(1):L3-L7.
7. Doubkova M, Karpisek M, Mazoch J, et al. Prognostic significance of surfactant protein A, surfactant protein D, Clara cell protein 16, S100 protein, trefoil factor 3, and prostatic secretory protein 94 in idiopathic pulmonary fibrosis, sarcoidosis, and chronic pulmonary obstructive disease. *Sarcoidosis Vasculitis & Diffuse Lung Diseases* 2016;33(3):224-34.
8. Guo L, Liu F, Jiang C, et al. Clinical Research on Prognostic Evaluation of Subjects With IPF by Peripheral Blood Biomarkers, Quantitative Imaging Characteristics and Pulmonary Function Parameters. *Archivos de Bronconeumologia* 2020;56(6):365-72.
9. Hamai K, Iwamoto H, Ishikawa N, et al. Comparative Study of Circulating MMP-7, CCL18, KL-6, SP-A, and SP-D as Disease Markers of Idiopathic Pulmonary Fibrosis. *Dis Markers* 2016;2016:4759040. doi: 10.1155/2016/4759040 [published Online First: 2016/06/14]
10. Hoyer N, Jessen H, Rønnow S, et al. Biomarkers of collagen formation are predictive of IPF progression and death. *European Respiratory Journal* 2020;56(suppl 64):5186. doi: 10.1183/13993003.congress-2020.5186
11. Jiang Y, Luo Q, Han Q, et al. Sequential changes of serum KL-6 predict the progression of interstitial lung disease. *Journal of Thoracic Disease* 2018;10(8):4705-14.
12. Jenkins RG, Simpson JK, Saini G, et al. Longitudinal change in collagen degradation biomarkers in idiopathic pulmonary fibrosis: An analysis from the prospective, multicentre PROFILE study. *The Lancet Respiratory Medicine* 2015;3(6):462-72.
13. Kennedy B, Branagan P, Moloney F, et al. Biomarkers to identify ILD and predict lung function decline in scleroderma lung disease or idiopathic pulmonary fibrosis. *Sarcoidosis Vasculitis and Diffuse Lung Diseases* 2015;32(3):228-36.
14. Kinder BW, Brown KK, McCormack FX, et al. Serum surfactant protein-A is a strong predictor of early mortality in idiopathic pulmonary fibrosis. *Chest* 2009;135(6):1557-63.

15. Maher TM, Oballa E, Simpson JK, et al. An epithelial biomarker signature for idiopathic pulmonary fibrosis: an analysis from the multicentre PROFILE cohort study. *The Lancet Respiratory Medicine* 2017;5(12):946-55.
16. Naik PK, Bozyk PD, Bentley JK, et al. Periostin promotes fibrosis and predicts progression in patients with idiopathic pulmonary fibrosis. *American Journal of Physiology - Lung Cellular & Molecular Physiology* 2012;303(12):L1046-56.
17. Han MK, Zhou Y, Murray S, et al. Lung microbiome and disease progression in idiopathic pulmonary fibrosis: An analysis of the COMET study. *The Lancet Respiratory Medicine* 2014;2(7):448-56.
18. Neighbors M, Cabanski CR, Ramalingam TR, et al. Prognostic and predictive biomarkers for patients with idiopathic pulmonary fibrosis treated with pirfenidone: post-hoc assessment of the CAPACITY and ASCEND trials. *The Lancet Respiratory Medicine* 2018;6(8):615-26.
19. Noble PW, Albera C, Bradford WZ, et al. Pirfenidone in patients with idiopathic pulmonary fibrosis (CAPACITY): two randomised trials. *Lancet (London, England)* 2011;377(9779):1760-9. doi: 10.1016/s0140-6736(11)60405-4 [published Online First: 2011/05/17]
20. King TE, Jr., Bradford WZ, Castro-Bernardini S, et al. A phase 3 trial of pirfenidone in patients with idiopathic pulmonary fibrosis.[Erratum appears in N Engl J Med. 2014 Sep 18;371(12):1172]. *New England Journal of Medicine* 2014;370(22):2083-92.
21. Ohshimo S, Ishikawa N, Horimasu Y, et al. Baseline KL-6 predicts increased risk for acute exacerbation of idiopathic pulmonary fibrosis. *Respiratory Medicine* 2014;108(7):1031-39.
22. Ohta S, Okamoto M, Fujimoto K, et al. The usefulness of monomeric periostin as a biomarker for idiopathic pulmonary fibrosis. *PLoS ONE [Electronic Resource]* 2017;12(3):e0174547.
23. Okamoto M, Hoshino T, Kitasato Y, et al. Periostin, a matrix protein, is a novel biomarker for idiopathic interstitial pneumonias. *The European respiratory journal* 2011;37(5):1119-27. doi: 10.1183/09031936.00059810 [published Online First: 2010/12/24]
24. Organ LA, Duggan A-MR, Oballa E, et al. Biomarkers of collagen synthesis predict progression in the PROFILE idiopathic pulmonary fibrosis cohort. *Respiratory Research* 2019;20(1):148. doi: 10.1186/s12931-019-1118-7
25. Papis SA, Tomos IP, Karakatsani A, et al. High levels of IL-6 and IL-8 characterize early-on idiopathic pulmonary fibrosis acute exacerbations. *Cytokine* 2018;102:168-72.
26. Prasse A, Probst C, Bargagli E, et al. Serum CC-chemokine ligand 18 concentration predicts outcome in idiopathic pulmonary fibrosis. *American Journal of Respiratory and Critical Care Medicine* 2009;179(8):717-23.
27. Raghu G, Richeldi L, Jagerschmidt A, et al. Idiopathic Pulmonary Fibrosis: Prospective, Case-Controlled Study of Natural History and Circulating Biomarkers. *Chest* 2018;154(6):1359-70.
28. Richards TJ, Kaminski N, Baribaud F, et al. Peripheral blood proteins predict mortality in idiopathic pulmonary fibrosis.[Erratum appears in Am J Respir Crit Care Med. 2012 Feb 15;185(4):464]. *American Journal of Respiratory & Critical Care Medicine* 2012;185(1):67-76.

29. Vuga LJ, Tedrow JR, Pandit KV, et al. C-X-C motif chemokine 13 (CXCL13) is a prognostic biomarker of idiopathic pulmonary fibrosis. *American Journal of Respiratory & Critical Care Medicine* 2014;189(8):966-74.
